# Supplementary material for: Copper(i)-mediated synthesis of β-hydroxysulfones from styrenes and sulfonylhydrazides: an electrochemical mechanistic study
Source: Royal Society of Chemistry journal article supplement (doi:10.1039/c6ra19190h), 2016-01-01

# Copper (I)-mediated synthesis of $\beta$ -hydroxysulfones from styrenes and sulfonylhydrazides. Electrochemical mechanistic study

Alexander O. Terent'ev,\*<sup>ab</sup> Olga M. Mulina,<sup>a</sup> Dmitry A. Pirgach,<sup>ab</sup>  
Dmitry V. Demchuk,<sup>a</sup> Mikhail A. Syroeshkin,<sup>a</sup> Gennady I. Nikishin<sup>a</sup>

<sup>a</sup> N. D. Zelinsky Institute of Organic Chemistry, Russian Academy of Sciences, 119991  
Moscow, Russian Federation. *Fax:* +7 499 135 53 28; *e-mail:* [terentev@ioc.ac.ru](mailto:terentev@ioc.ac.ru)

<sup>b</sup> D.I. Mendeleev University of Chemical Technology of Russia, 125047,  
Moscow, Russian Federation

## SUPPORTING INFORMATION

### Table of Content

|                                                                 |   |
|-----------------------------------------------------------------|---|
| Electrochemical study of redox properties of the reagents ..... | 2 |
| NMR Spectra of Synthesized Compounds .....                      | 4 |

## Electrochemical study of redox properties of the reagents

Cyclic voltammetry (CV) were implemented on an IPC-Pro computer-assisted potentiostat manufactured by Econix (scan rate error 1.0%, potential setting 0.25 mV). The experiments were performed in a 10-ml five-neck glass conic electrochemical cell with a water jacket for thermostating. CV curves were recorded using a three-electrode scheme. The working electrode was a disc glassy-carbon electrode ( $d = 1.7$  mm). A platinum wire served as an auxiliary electrode. A saturated calomel electrode was used as the reference electrode and was linked to the solution by a bridge with a porous ceramic diaphragm filled with background electrolyte. The tested solutions were thermostatted at  $25 \pm 0.5$  °C. In a typical case, 5 ml solution was utilized and the depolarizer concentration was  $2 \text{ mmol} \cdot \text{L}^{-1}$ . The working electrode was polished before recording each CV curve.

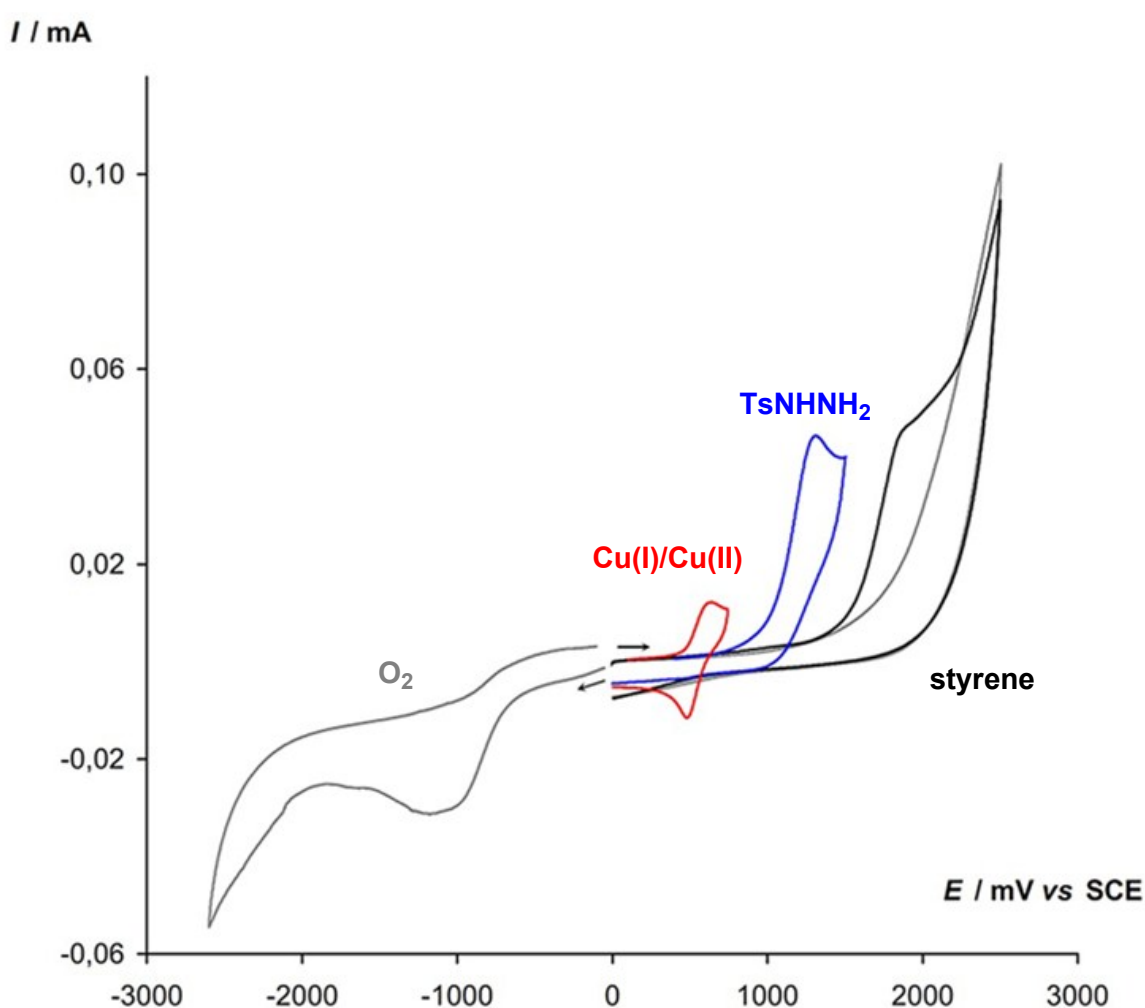

**Figure 1** CV curves for 2.0 mmol/L solutions of CuBr (red), *p*-toluenesulfonylhydrazide **2a** (blue), styrene **1a** (black) and aerated supporting solution (grey) in 0.1M  $\text{Bu}_4\text{NClO}_4$  in  $\text{CH}_3\text{CN}-\text{H}_2\text{O}$  (5:1) on a working glassy-carbon electrode ( $d = 1.7$  mm) under scan rate 100 mV/s.

**Table 1** CV curves parameters in V vs SCE for styrene, TsNHNH<sub>2</sub>, CuBr and O<sub>2</sub> solutions in 0.1M Bu<sub>4</sub>NClO<sub>4</sub> in CH<sub>3</sub>CN–H<sub>2</sub>O (5:1) on a working glassy-carbon electrode (d = 1.7 mm) under scan rate 100 mV/s

| <i>Substance</i>    | $E^{onset}$ | <i>Scan<br/>direction</i> | $E^{peak}_{forward}$ | $E^{peak}_{reverse}$ | $E^{1/2}$ |
|---------------------|-------------|---------------------------|----------------------|----------------------|-----------|
| Styrene             | 0           | +                         | 1.90                 | -                    | -         |
| TsNHNH <sub>2</sub> | 0           | +                         | 1.35                 | -                    | -         |
| Cu <sup>+</sup>     | 0           | +                         | 0.65                 | 0.45                 | 0.55      |
| O <sub>2</sub>      | 0           | —                         | - 1.10               | -                    | -         |

# NMR Spectra of Synthesized Compounds

## 1-Isopropyl-4-vinylbenzene (1c)

|                        |                |                      |                      |                       |        |
|------------------------|----------------|----------------------|----------------------|-----------------------|--------|
| Acquisition Time (sec) | 1.3518         | Date                 | 15 Oct 2015 11:41:52 | Frequency (MHz)       | 300.13 |
| File Name              |                | Number of Transients | 1                    | Original Points Count | 8124   |
| Nucleus                | <sup>1</sup> H | Solvent              | CHLOROFORM-D         | Points Count          | 8192   |
| Pulse Sequence         | zg             | Sweep Width (Hz)     | 6009.62              |                       |        |
| Temperature (degree C) | 26.000         |                      |                      |                       |        |

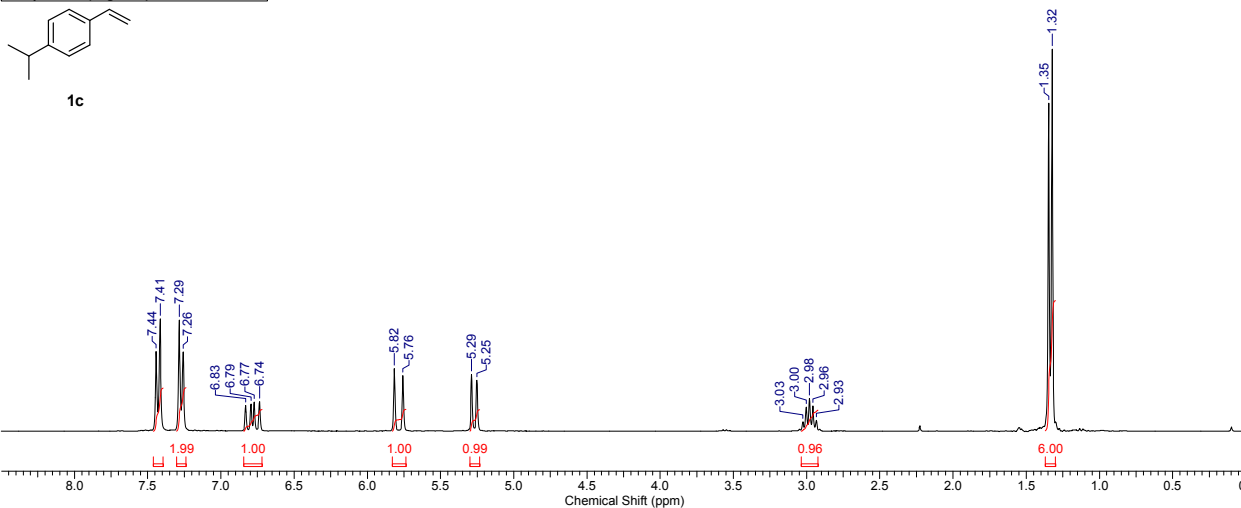

|                        |                 |                      |                      |                        |        |
|------------------------|-----------------|----------------------|----------------------|------------------------|--------|
| Acquisition Time (sec) | 0.9006          | Date                 | 15 Oct 2015 16:00:00 | Frequency (MHz)        | 75.48  |
| File Name              |                 | Number of Transients | 111                  | Original Points Count  | 16316  |
| Nucleus                | <sup>13</sup> C | Solvent              | CHLOROFORM-D         | Points Count           | 16384  |
| Pulse Sequence         | zgpg30          | Sweep Width (Hz)     | 18115.94             | Temperature (degree C) | 25.800 |

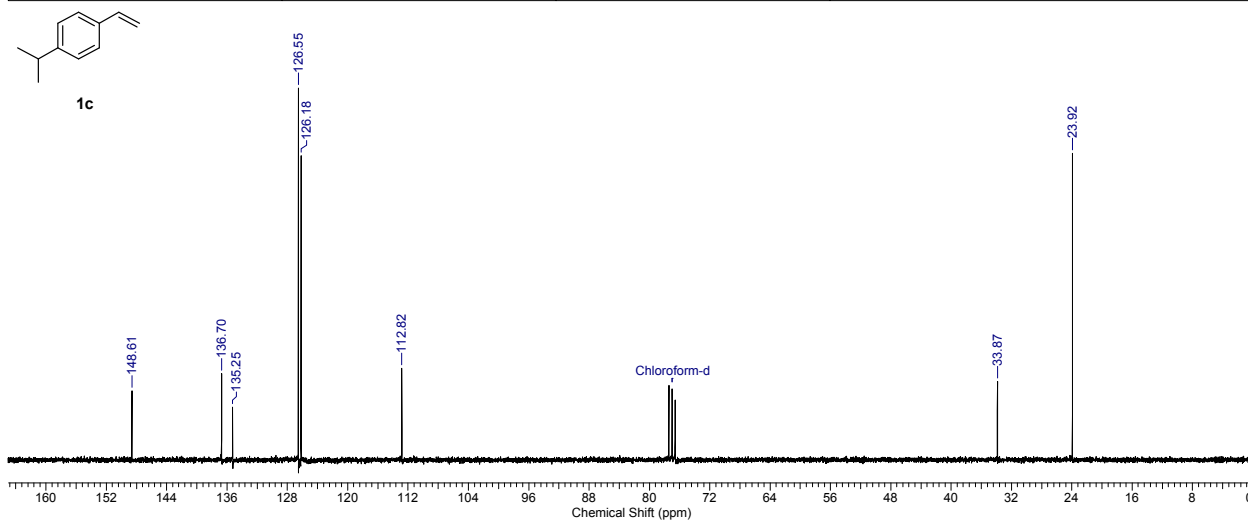

# 1-Chloro-4-isopropenylbenzene (1g)

|                        |        |                      |                      |                        |                      |
|------------------------|--------|----------------------|----------------------|------------------------|----------------------|
| Acquisition Time (sec) | 1.0832 | Comment              | Avance-300, 1H CDCl3 | Date                   | 31 Jul 2015 14:43:12 |
| File Name              |        |                      |                      | Frequency (MHz)        | 300.13               |
| Nucleus                | 1H     | Number of Transients | 1                    | Original Points Count  | 8124                 |
| Pulse Sequence         | zg     | Solvent              | CHLOROFORM-D         | Sweep Width (Hz)       | 7500.00              |
|                        |        |                      |                      | Points Count           | 8192                 |
|                        |        |                      |                      | Temperature (degree C) | 24.800               |

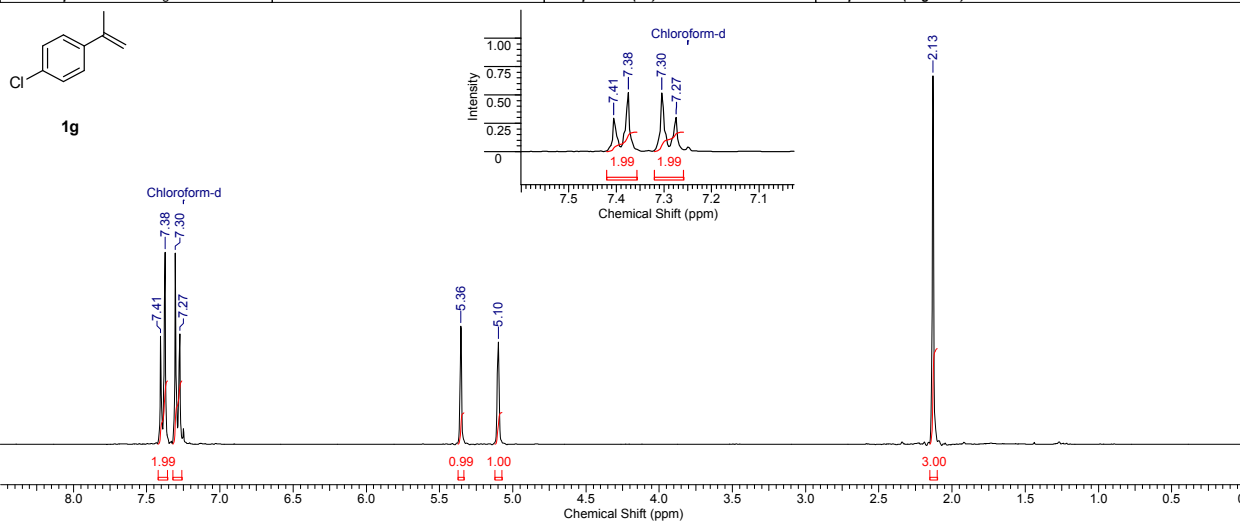

|                        |        |                      |                      |                        |          |
|------------------------|--------|----------------------|----------------------|------------------------|----------|
| Acquisition Time (sec) | 0.9006 | Date                 | 21 Jul 2015 14:30:24 | Frequency (MHz)        | 75.48    |
| File Name              |        |                      |                      | Points Count           | 16384    |
| Nucleus                | 13C    | Number of Transients | 115                  | Original Points Count  | 16316    |
| Pulse Sequence         | zgpg30 | Solvent              | CHLOROFORM-D         | Sweep Width (Hz)       | 18115.94 |
|                        |        |                      |                      | Temperature (degree C) | 25.900   |

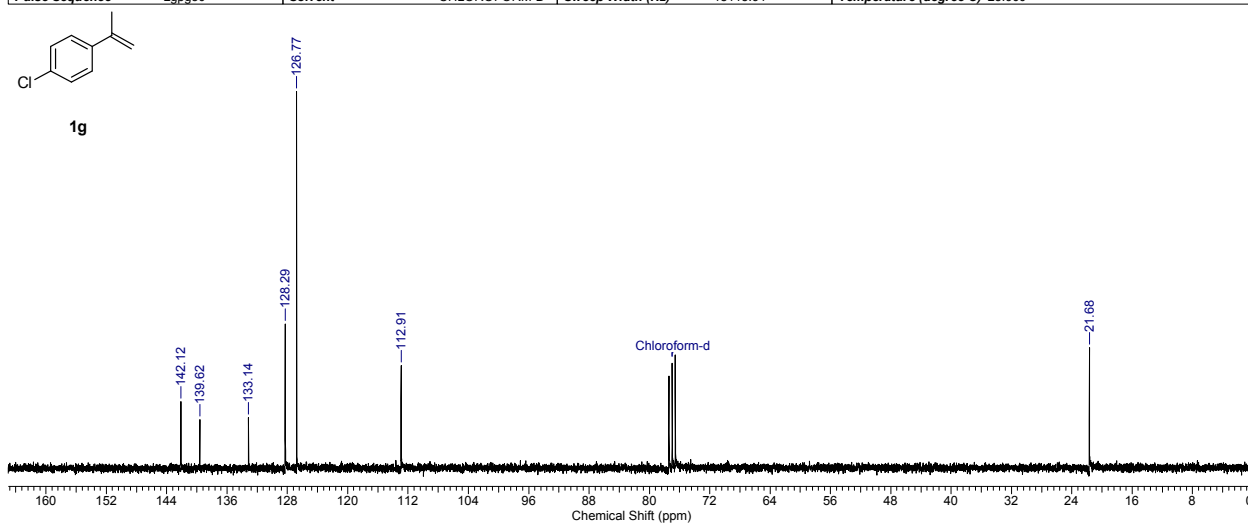

# 1-Bromo-4-isopropenylbenzene (1h)

|                        |                |                      |                      |                  |         |
|------------------------|----------------|----------------------|----------------------|------------------|---------|
| Acquisition Time (sec) | 1.3518         | Date                 | 24 Sep 2015 15:19:28 | Frequency (MHz)  | 300.13  |
| File Name              |                | Number of Transients | 1                    | Points Count     | 8124    |
| Nucleus                | <sup>1</sup> H | Solvent              | CHLOROFORM-D         | Sweep Width (Hz) | 6009.62 |
| Pulse Sequence         | zg             |                      |                      |                  |         |
| Temperature (degree C) | 25.100         |                      |                      |                  |         |

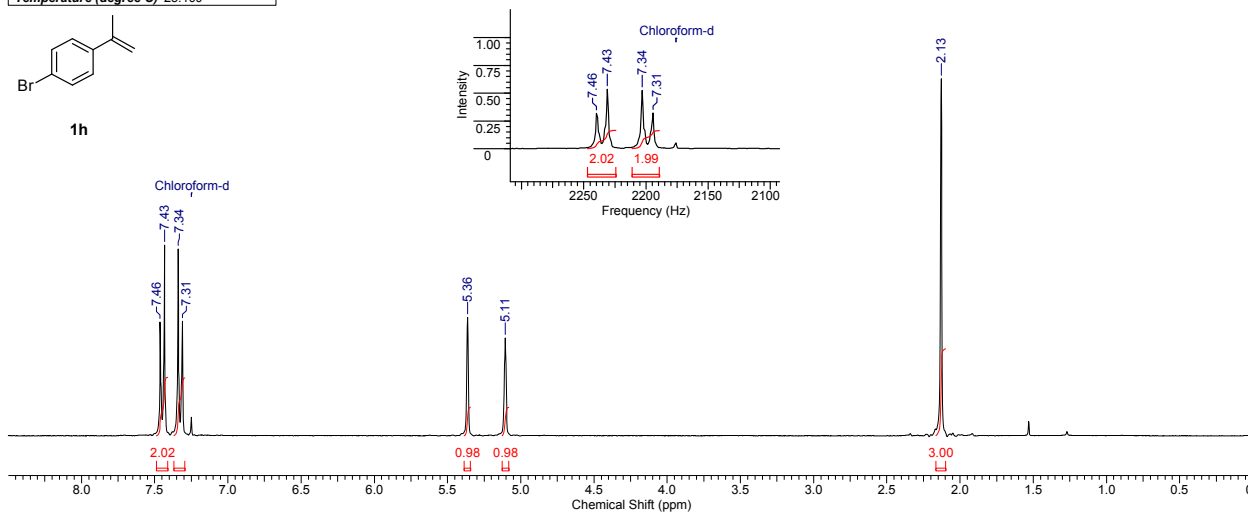

|                        |                 |                      |                |                        |                      |
|------------------------|-----------------|----------------------|----------------|------------------------|----------------------|
| Acquisition Time (sec) | 0.8680          | Comment              | adil.cdcl3.c13 | Date                   | 26 Sep 2015 10:14:24 |
| File Name              |                 | Number of Transients | 138            | Points Count           | 16316                |
| Nucleus                | <sup>13</sup> C | Solvent              | CHLOROFORM-D   | Sweep Width (Hz)       | 18796.99             |
| Pulse Sequence         | zgpg60base      |                      |                | Temperature (degree C) | 26.400               |

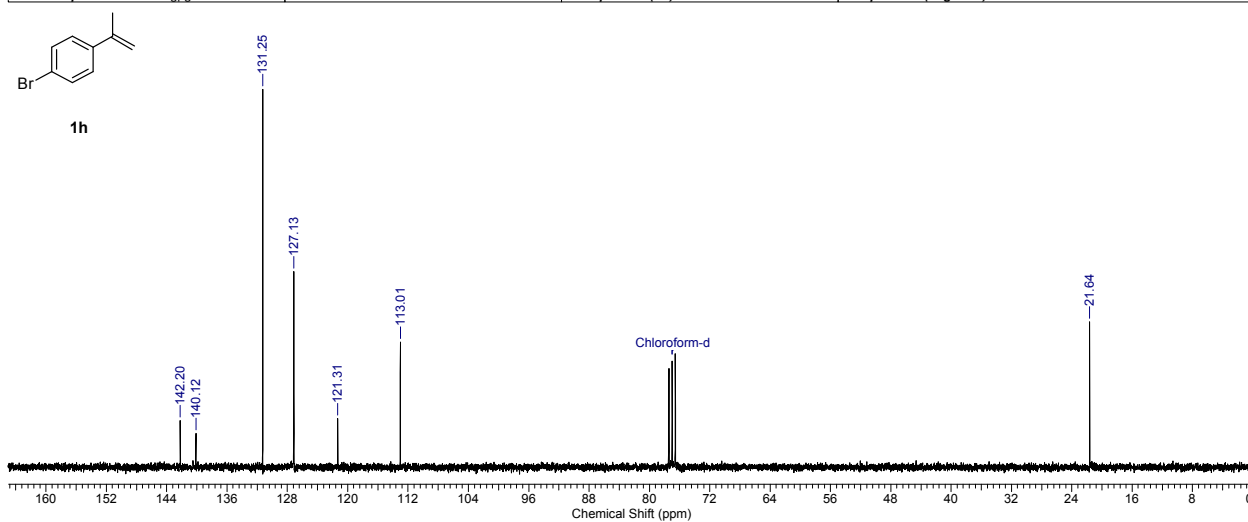

# 1-Isopropenyl-4-nitrobenzene (1i)

|                        |        |                      |                      |                        |                      |
|------------------------|--------|----------------------|----------------------|------------------------|----------------------|
| Acquisition Time (sec) | 1.3518 | Comment              | Avance-300, 1H CDCl3 | Date                   | 03 Sep 2015 12:37:20 |
| File Name              |        |                      |                      | Frequency (MHz)        | 300.13               |
| Nucleus                | 1H     | Number of Transients | 1                    | Original Points Count  | 8124                 |
| Pulse Sequence         | zg     | Solvent              | CHLOROFORM-D         | Sweep Width (Hz)       | 6009.62              |
|                        |        |                      |                      | Points Count           | 8192                 |
|                        |        |                      |                      | Temperature (degree C) | 23.500               |

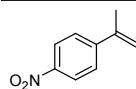

1i

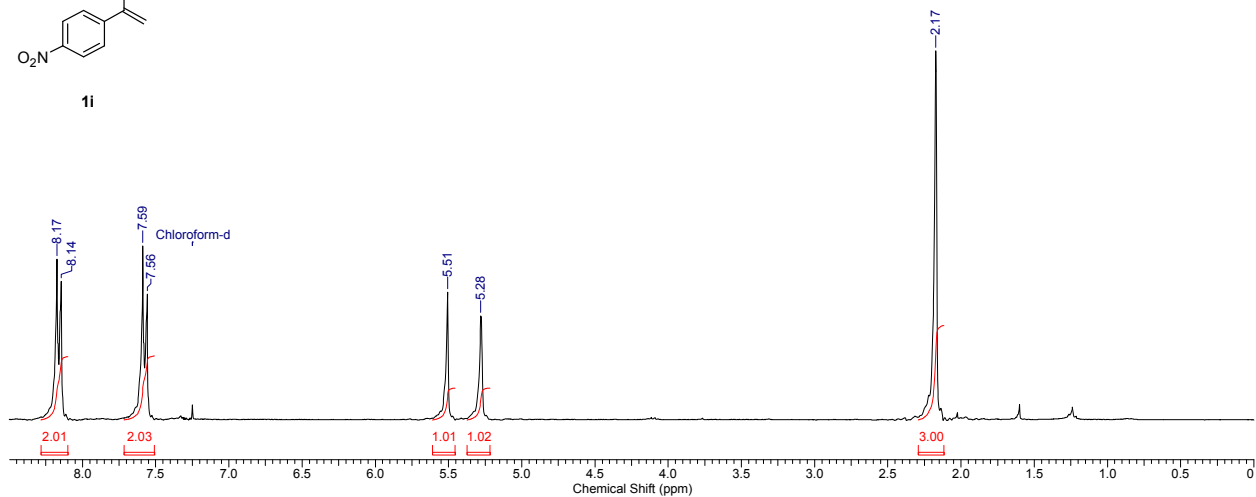

|                        |            |                      |                |                        |                      |
|------------------------|------------|----------------------|----------------|------------------------|----------------------|
| Acquisition Time (sec) | 0.8680     | Comment              | adil.cdcl3.c13 | Date                   | 04 Sep 2015 10:40:00 |
| File Name              |            |                      |                | Frequency (MHz)        | 75.48                |
| Nucleus                | 13C        | Number of Transients | 130            | Original Points Count  | 16316                |
| Pulse Sequence         | zpgg60base | Solvent              | CHLOROFORM-D   | Sweep Width (Hz)       | 18796.99             |
|                        |            |                      |                | Points Count           | 16384                |
|                        |            |                      |                | Temperature (degree C) | 25.600               |

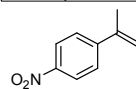

1i

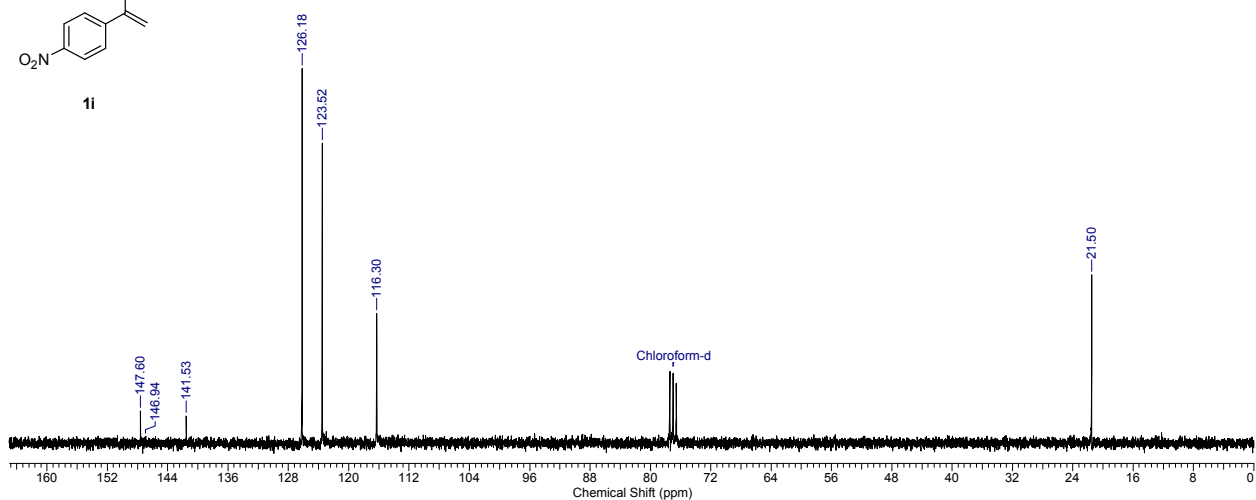

# 1-Isopropenyl-4-methoxybenzene (1j)

|                        |                |                      |                      |                        |         |
|------------------------|----------------|----------------------|----------------------|------------------------|---------|
| Acquisition Time (sec) | 1.3518         | Date                 | 24 Sep 2015 15:21:36 | Frequency (MHz)        | 300.13  |
| File Name              |                |                      |                      | Points Count           | 8192    |
| Nucleus                | <sup>1</sup> H | Number of Transients | 1                    | Original Points Count  | 8124    |
| Pulse Sequence         | zg             | Solvent              | CHLOROFORM-D         | Sweep Width (Hz)       | 6009.62 |
|                        |                |                      |                      | Temperature (degree C) | 25.100  |

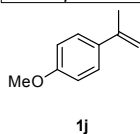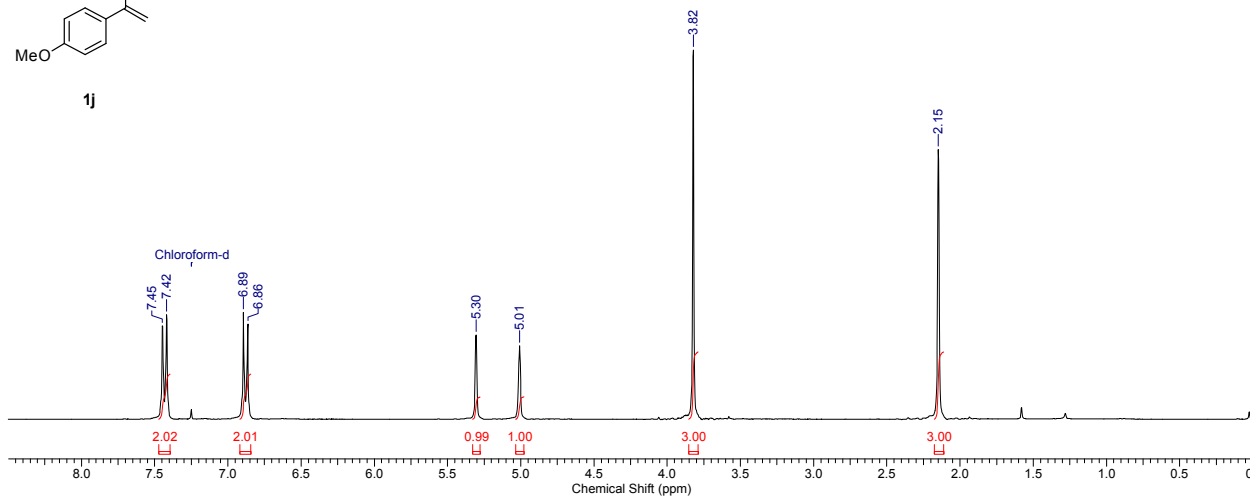

|                        |                 |                      |                |                        |                      |
|------------------------|-----------------|----------------------|----------------|------------------------|----------------------|
| Acquisition Time (sec) | 0.8680          | Comment              | adli.cdcl3.c13 | Date                   | 26 Sep 2015 09:59:28 |
| File Name              |                 |                      |                | Frequency (MHz)        | 75.48                |
| Nucleus                | <sup>13</sup> C | Number of Transients | 67             | Original Points Count  | 16316                |
| Pulse Sequence         | zpgg90base      | Solvent              | CHLOROFORM-D   | Sweep Width (Hz)       | 18796.99             |
|                        |                 |                      |                | Temperature (degree C) | 25.500               |

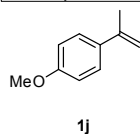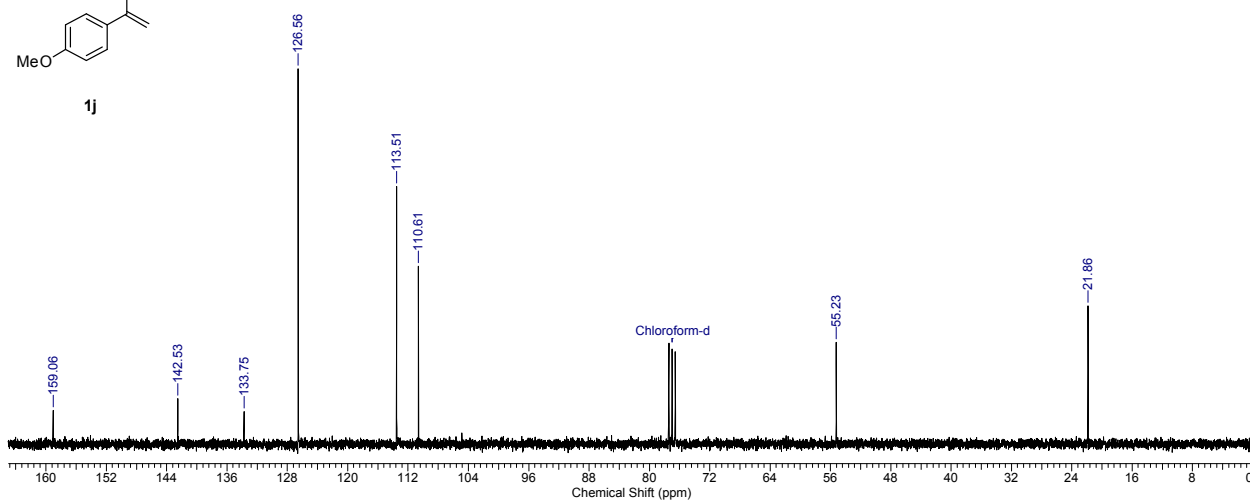



## 4-Iodobenzenesulfonohydrazide (2b)

|                        |        |                      |                        |                        |                      |
|------------------------|--------|----------------------|------------------------|------------------------|----------------------|
| Acquisition Time (sec) | 1.3521 | Comment              | Avance-300, 1H DMSO-d6 | Date                   | 20 Aug 2015 15:30:08 |
| File Name              |        |                      |                        | Frequency (MHz)        | 300.13               |
| Nucleus                | 1H     | Number of Transients | 1                      | Original Points Count  | 8116                 |
| Pulse Sequence         | zg     | Solvent              | DMSO-D6                | Sweep Width (Hz)       | 6002.40              |
|                        |        |                      |                        | Points Count           | 8192                 |
|                        |        |                      |                        | Temperature (degree C) | 27.000               |

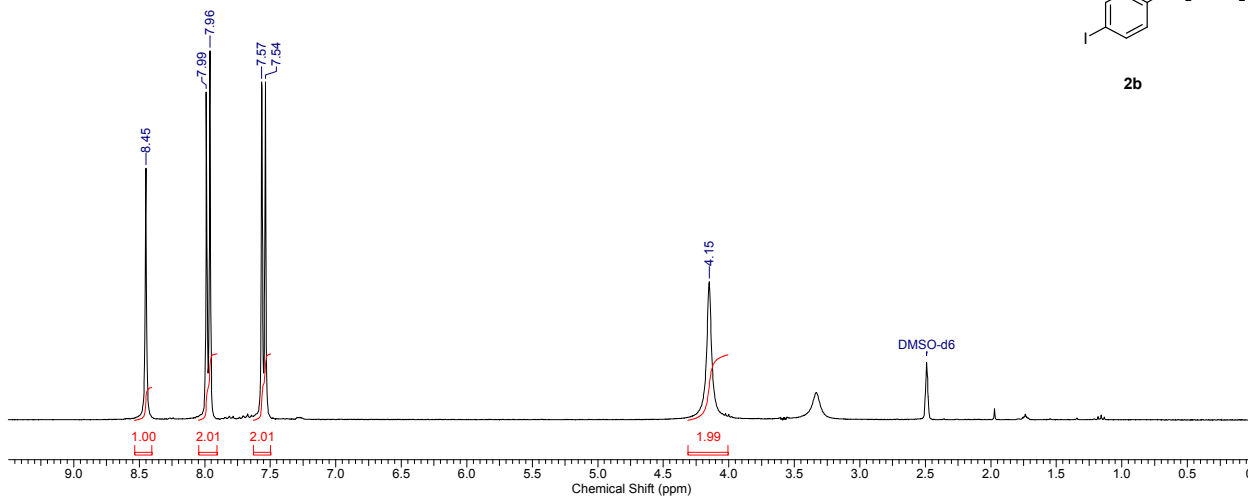

|                        |            |                      |          |                        |                      |
|------------------------|------------|----------------------|----------|------------------------|----------------------|
| Acquisition Time (sec) | 0.8643     | Comment              | c13,dms0 | Date                   | 24 Aug 2015 14:00:32 |
| File Name              |            |                      |          | Frequency (MHz)        | 75.48                |
| Nucleus                | 13C        | Number of Transients | 155      | Original Points Count  | 16308                |
| Pulse Sequence         | zpgg60base | Solvent              | DMSO-D6  | Sweep Width (Hz)       | 18867.92             |
|                        |            |                      |          | Points Count           | 16384                |
|                        |            |                      |          | Temperature (degree C) | 25.100               |

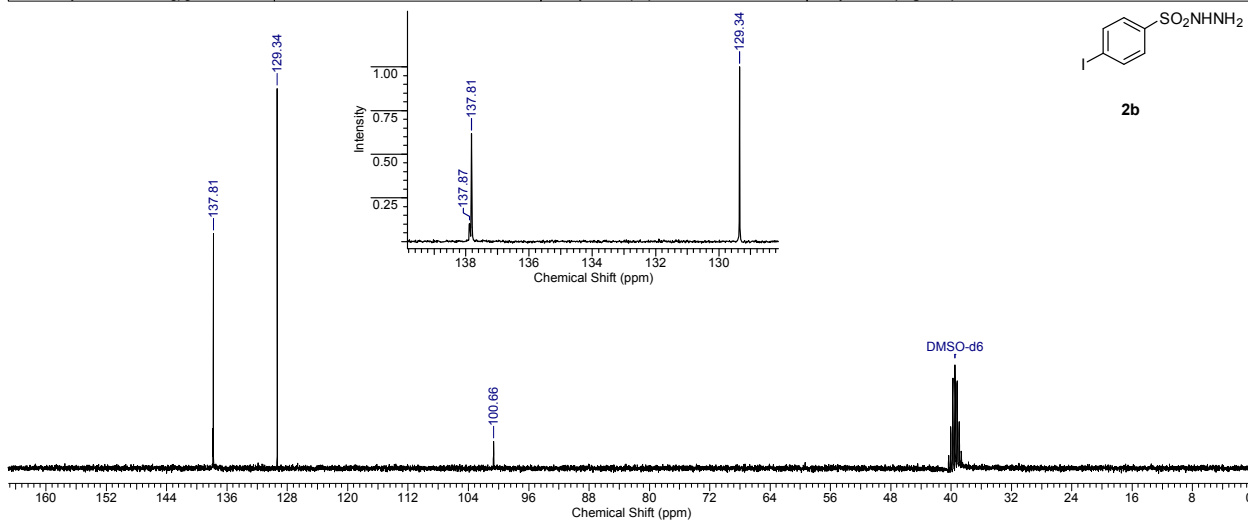

## 4-Bromobenzenesulfonohydrazide (2c)

|                        |        |                      |                        |                        |                      |
|------------------------|--------|----------------------|------------------------|------------------------|----------------------|
| Acquisition Time (sec) | 1.3521 | Comment              | Avance-300, 1H DMSO-d6 | Date                   | 27 Aug 2015 10:40:00 |
| File Name              |        |                      |                        | Frequency (MHz)        | 300.13               |
| Nucleus                | 1H     | Number of Transients | 1                      | Original Points Count  | 8116                 |
| Pulse Sequence         | zg     | Solvent              | DMSO-D6                | Sweep Width (Hz)       | 6002.40              |
|                        |        |                      |                        | Points Count           | 8192                 |
|                        |        |                      |                        | Temperature (degree C) | 24.300               |

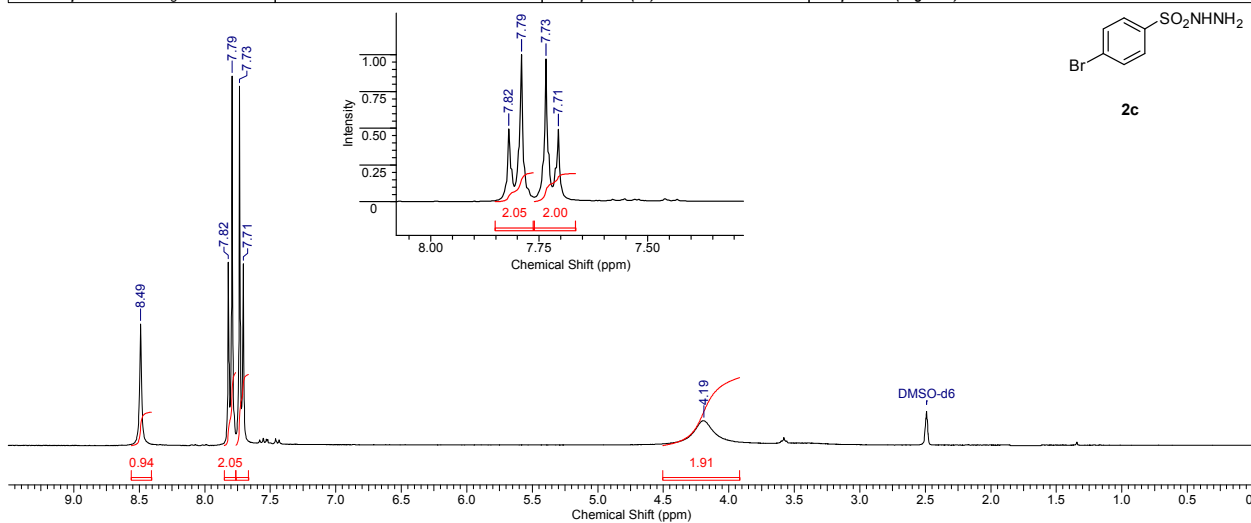

|                        |            |                      |          |                        |                      |
|------------------------|------------|----------------------|----------|------------------------|----------------------|
| Acquisition Time (sec) | 0.8643     | Comment              | c13.dms0 | Date                   | 05 Sep 2015 09:29:36 |
| File Name              |            |                      |          | Frequency (MHz)        | 75.48                |
| Nucleus                | 13C        | Number of Transients | 67       | Original Points Count  | 16308                |
| Pulse Sequence         | zgpg90base | Solvent              | DMSO-D6  | Sweep Width (Hz)       | 18867.92             |
|                        |            |                      |          | Points Count           | 16384                |
|                        |            |                      |          | Temperature (degree C) | 25.900               |

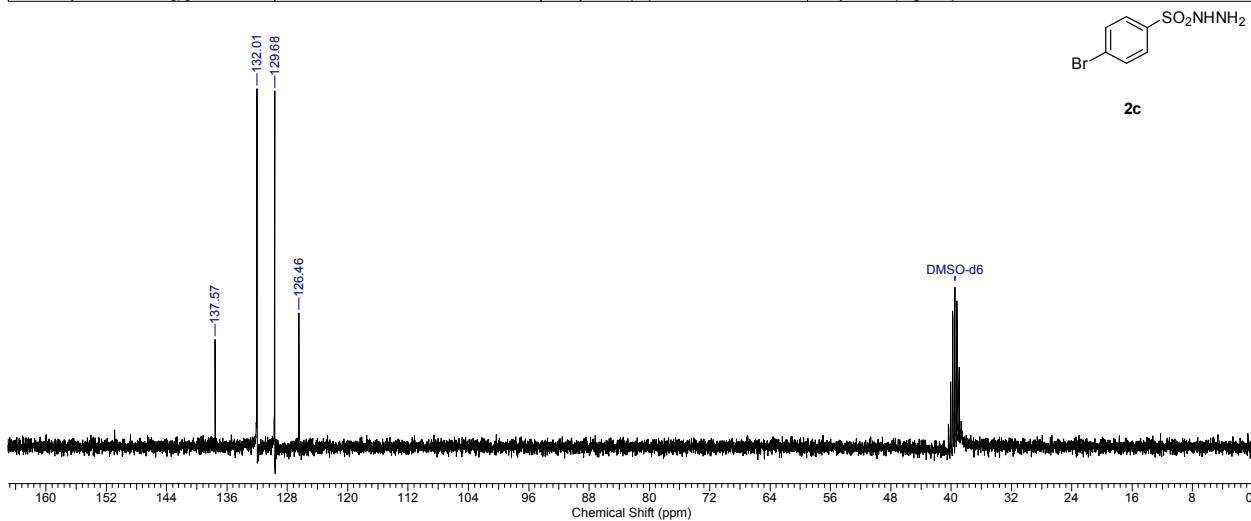

## 4-Methoxybenzenesulfonylhydrazide (2d)

|                        |                |                      |                      |                       |                 |                        |        |
|------------------------|----------------|----------------------|----------------------|-----------------------|-----------------|------------------------|--------|
| Acquisition Time (sec) | 1.3521         | Date                 | 15 Jul 2015 12:48:00 |                       | Frequency (MHz) | 300.13                 |        |
| File Name              |                |                      |                      |                       | Points Count    | 8192                   |        |
| Nucleus                | <sup>1</sup> H | Number of Transients | 1                    | Original Points Count | 8116            | Temperature (degree C) | 25.500 |
| Pulse Sequence         | zg             | Solvent              | DMSO-D6              | Sweep Width (Hz)      | 6002.40         |                        |        |

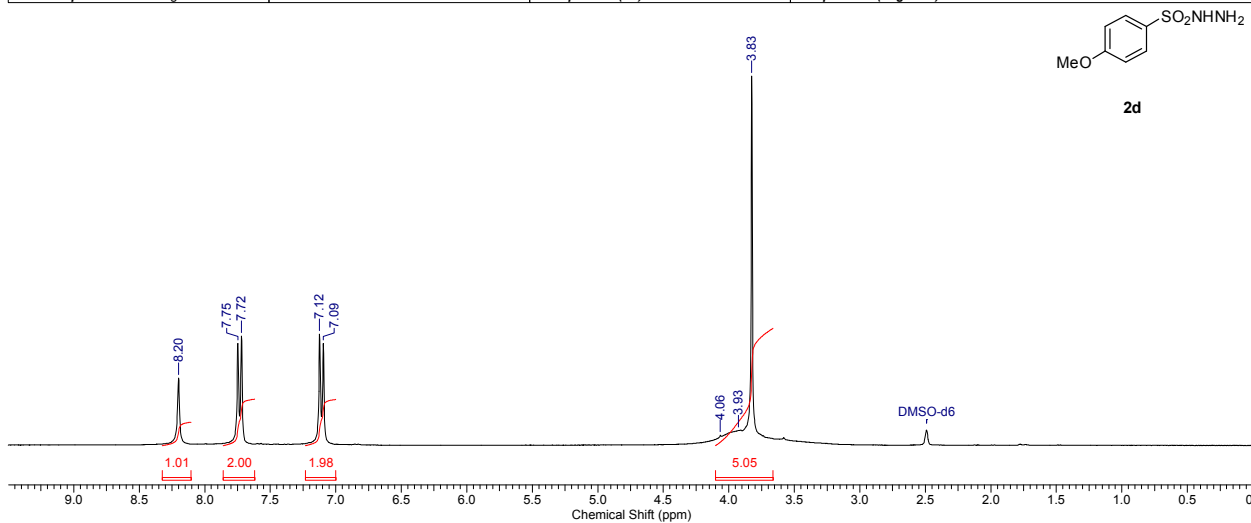

|                        |                 |                      |                      |                       |                 |                        |        |
|------------------------|-----------------|----------------------|----------------------|-----------------------|-----------------|------------------------|--------|
| Acquisition Time (sec) | 0.9002          | Date                 | 15 Jul 2015 12:52:16 |                       | Frequency (MHz) | 75.48                  |        |
| File Name              |                 |                      |                      |                       | Points Count    | 16384                  |        |
| Nucleus                | <sup>13</sup> C | Number of Transients | 177                  | Original Points Count | 16308           | Temperature (degree C) | 25.600 |
| Pulse Sequence         | zpgg90base      | Solvent              | DMSO-D6              | Sweep Width (Hz)      | 18115.94        |                        |        |

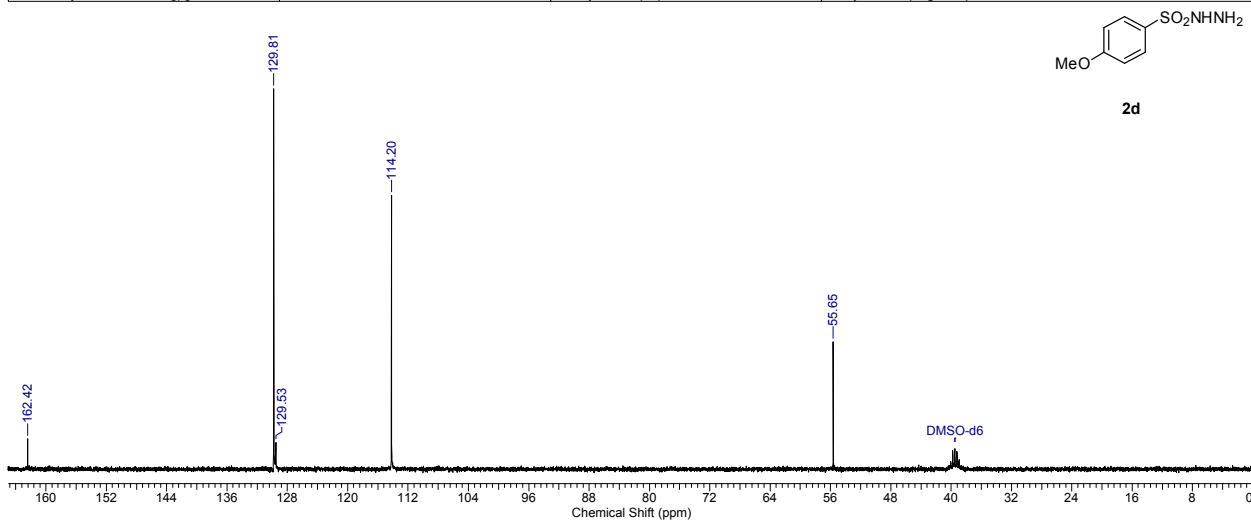

## 4-Nitrobenzenesulfonylhydrazide (2e)

|                        |        |                      |                        |                        |                      |
|------------------------|--------|----------------------|------------------------|------------------------|----------------------|
| Acquisition Time (sec) | 1.3521 | Comment              | Avance-300, 1H DMSO-d6 | Date                   | 20 Aug 2015 11:54:40 |
| File Name              |        |                      |                        | Frequency (MHz)        | 300.13               |
| Nucleus                | 1H     | Number of Transients | 1                      | Original Points Count  | 8116                 |
| Pulse Sequence         | zg     | Solvent              | DMSO-D6                | Sweep Width (Hz)       | 6002.40              |
|                        |        |                      |                        | Points Count           | 8192                 |
|                        |        |                      |                        | Temperature (degree C) | 26.200               |

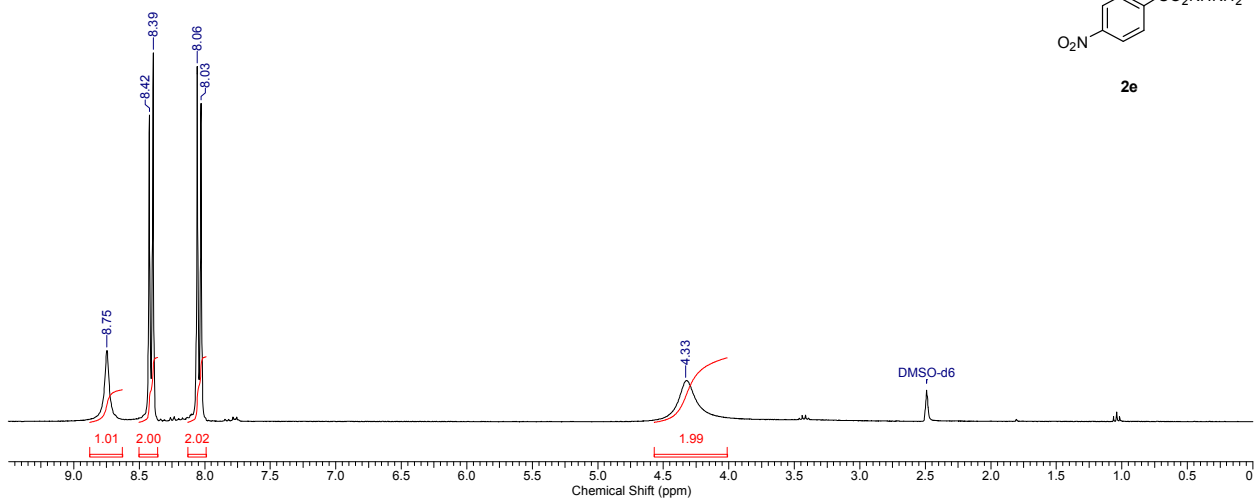

|                        |            |                      |          |                        |                      |
|------------------------|------------|----------------------|----------|------------------------|----------------------|
| Acquisition Time (sec) | 0.8643     | Comment              | c13,dms0 | Date                   | 21 Aug 2015 14:51:44 |
| File Name              |            |                      |          | Frequency (MHz)        | 75.48                |
| Nucleus                | 13C        | Number of Transients | 119      | Original Points Count  | 16308                |
| Pulse Sequence         | zpgg60base | Solvent              | DMSO-D6  | Sweep Width (Hz)       | 18867.92             |
|                        |            |                      |          | Points Count           | 16384                |
|                        |            |                      |          | Temperature (degree C) | 28.200               |

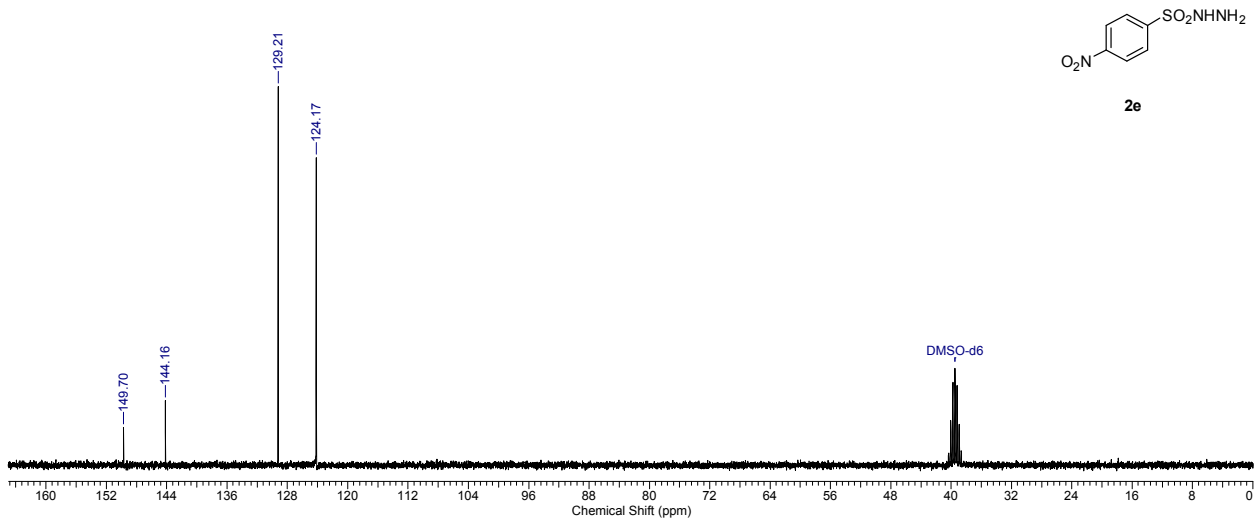

## 2-[(4-Methylphenyl)sulfonyl]-1-phenylethanol (3aa)

|                        |                |                      |                      |                       |        |
|------------------------|----------------|----------------------|----------------------|-----------------------|--------|
| Acquisition Time (sec) | 1.3518         | Date                 | 09 Nov 2015 17:44:32 | Frequency (MHz)       | 300.13 |
| File Name              |                | Number of Transients | 1                    | Original Points Count | 8124   |
| Nucleus                | <sup>1</sup> H | Solvent              | CHLOROFORM-D         | Points Count          | 8192   |
| Pulse Sequence         | zg             | Sweep Width (Hz)     | 6009.62              |                       |        |
| Temperature (degree C) | 25.000         |                      |                      |                       |        |

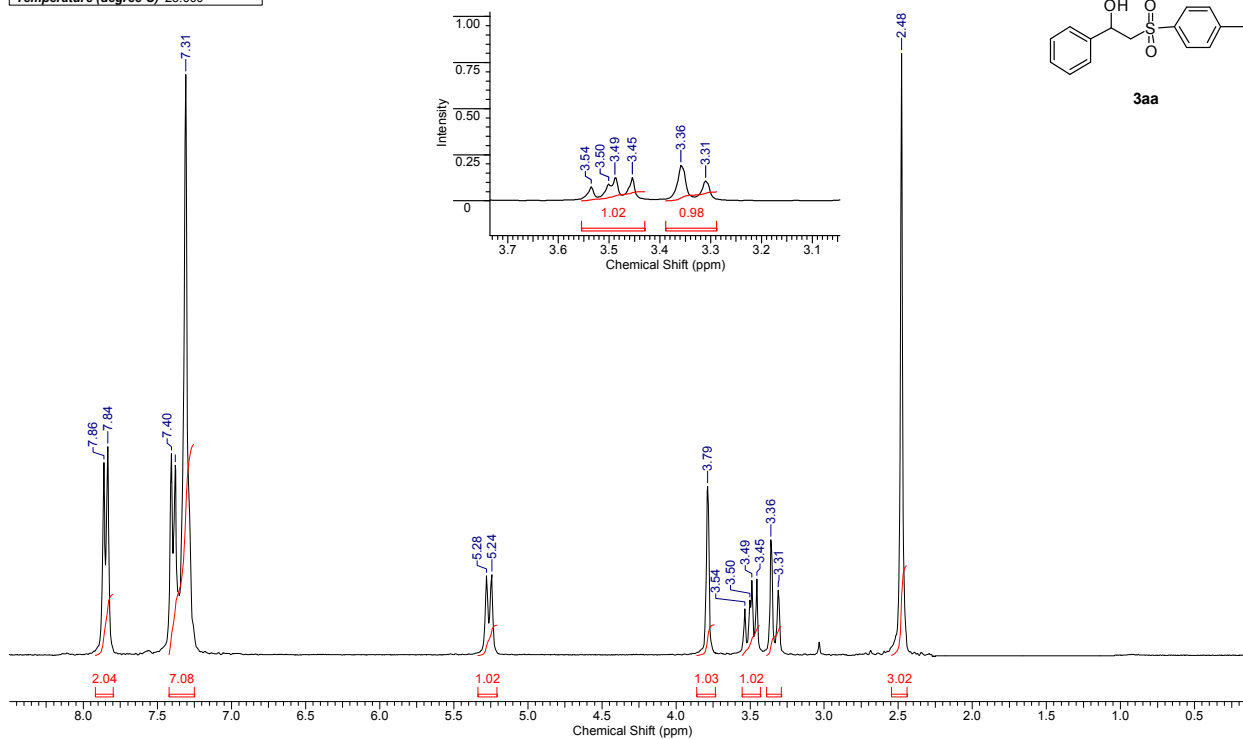

|                        |                 |                      |                      |                       |                  |              |       |
|------------------------|-----------------|----------------------|----------------------|-----------------------|------------------|--------------|-------|
| Acquisition Time (sec) | 0.9006          | Date                 | 09 Nov 2015 17:46:40 |                       | Frequency (MHz)  | 75.48        |       |
| File Name              |                 | Number of Transients | 190                  | Original Points Count | 16316            | Points Count | 16384 |
| Nucleus                | <sup>13</sup> C | Solvent              | CHLOROFORM-D         |                       | Sweep Width (Hz) | 18115.94     |       |
| Pulse Sequence         | zgpg30          |                      |                      |                       |                  |              |       |
| Temperature (degree C) | 25.000          |                      |                      |                       |                  |              |       |

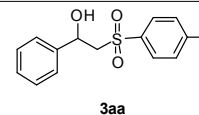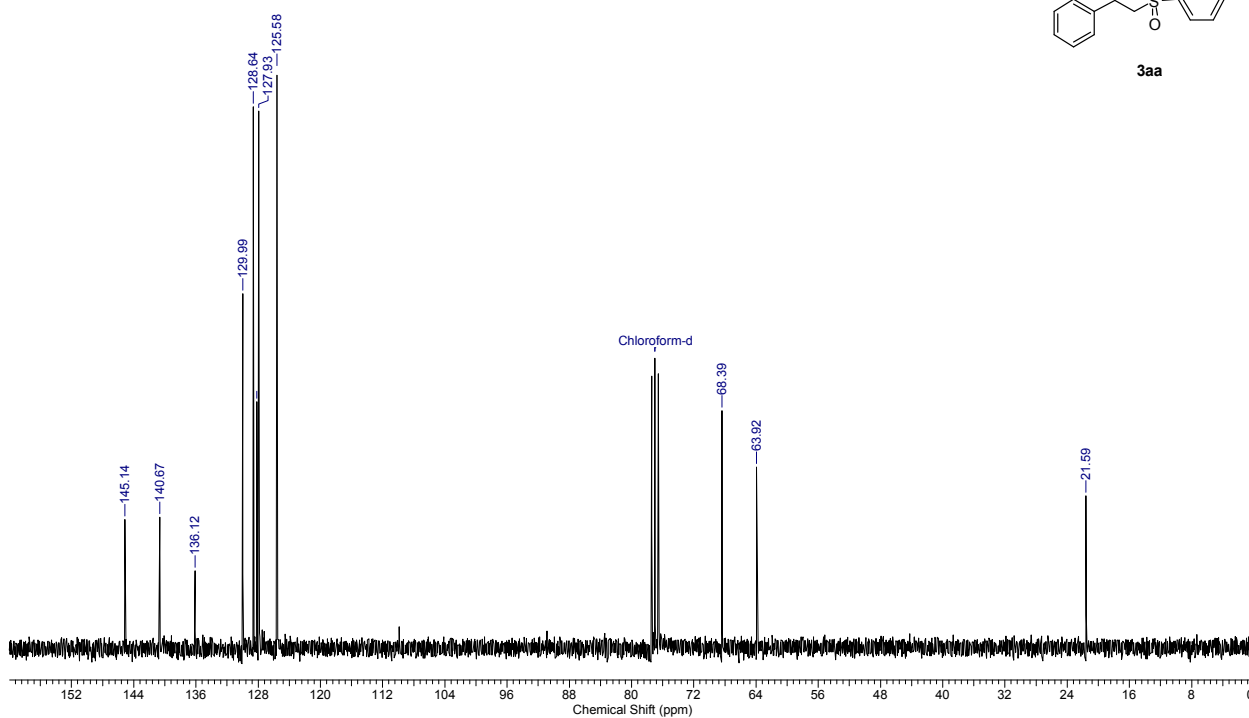

**1-(2-Methylphenyl)-2-[(4-methylphenyl)sulfonyl]ethanol (3ba)**

|                        |                |                        |                      |                       |                  |              |      |
|------------------------|----------------|------------------------|----------------------|-----------------------|------------------|--------------|------|
| Acquisition Time (sec) | 1.3518         | Date                   | 09 Nov 2015 15:04:32 |                       | Frequency (MHz)  | 300.13       |      |
| File Name              |                | Number of Transients   | 1                    | Original Points Count | 8124             | Points Count | 8192 |
| Nucleus                | <sup>1</sup> H | Solvent                | CHLOROFORM-D         |                       | Sweep Width (Hz) | 6009.62      |      |
| Pulse Sequence         | zg             | Temperature (degree C) | 24.900               |                       |                  |              |      |

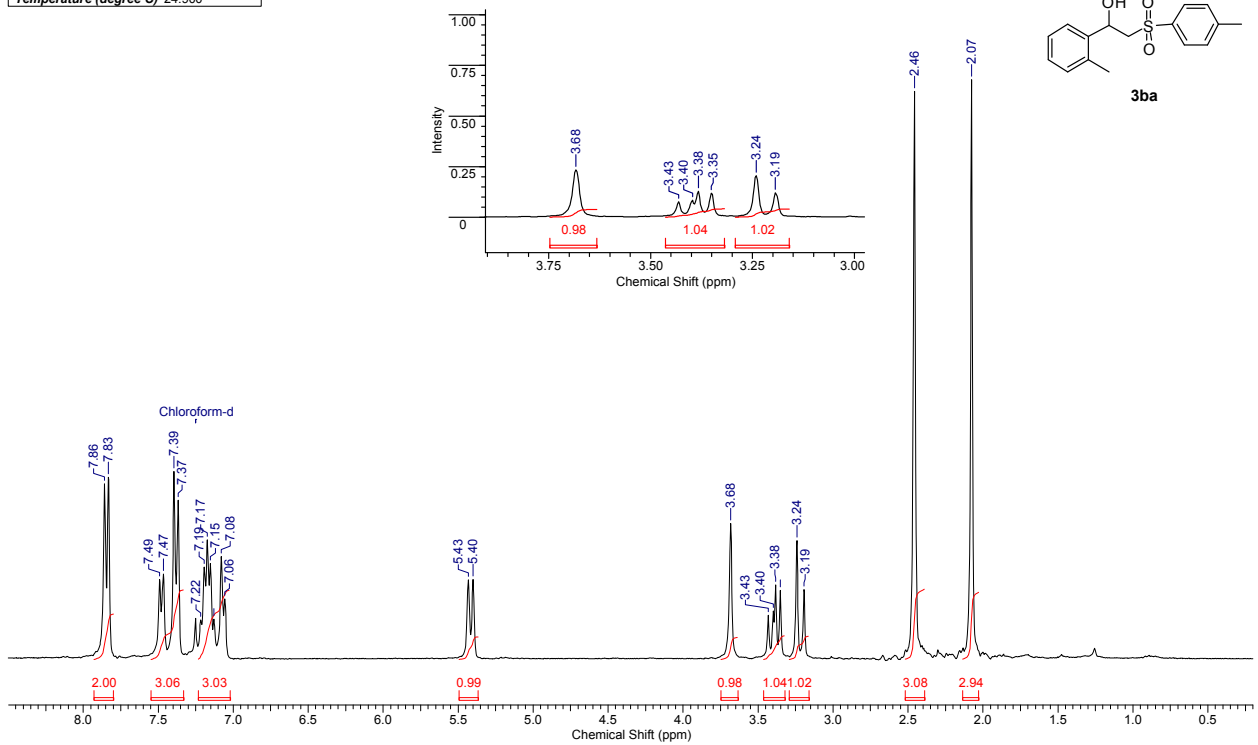

|                        |                 |                        |                      |                       |                  |              |       |
|------------------------|-----------------|------------------------|----------------------|-----------------------|------------------|--------------|-------|
| Acquisition Time (sec) | 0.9006          | Date                   | 11 Nov 2015 11:48:16 |                       | Frequency (MHz)  | 75.48        |       |
| File Name              |                 | Number of Transients   | 164                  | Original Points Count | 16316            | Points Count | 16384 |
| Nucleus                | <sup>13</sup> C | Solvent                | CHLOROFORM-D         |                       | Sweep Width (Hz) | 18115.94     |       |
| Pulse Sequence         | zgpg30          | Temperature (degree C) | 24.500               |                       |                  |              |       |

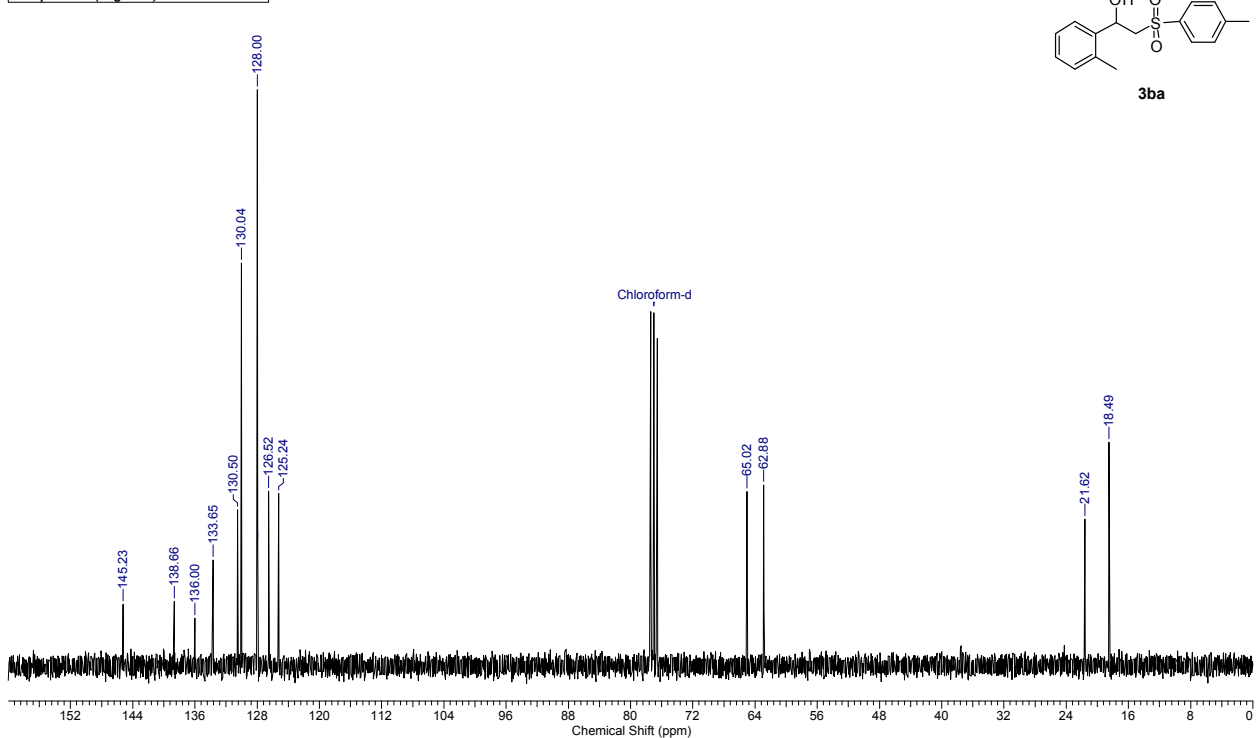

# 1-(4-Isopropylphenyl)-2-[(4-methylphenyl)sulfonyl]ethanol (3ca)

|                        |         |                        |                      |                 |                |
|------------------------|---------|------------------------|----------------------|-----------------|----------------|
| Acquisition Time (sec) | 1.3521  | Date                   | 18 Nov 2015 17:21:04 | File Name       |                |
| Number of Transients   | 1       | Original Points Count  | 8116                 | Points Count    | 8192           |
| Sweep Width (Hz)       | 6002.40 | Temperature (degree C) | 24.700               | Frequency (MHz) | 300.13         |
|                        |         |                        |                      | Pulse Sequence  | zg             |
|                        |         |                        |                      | Nucleus         | <sup>1</sup> H |
|                        |         |                        |                      | Solvent         | DMSO-D6        |

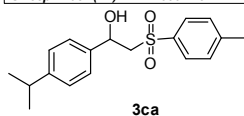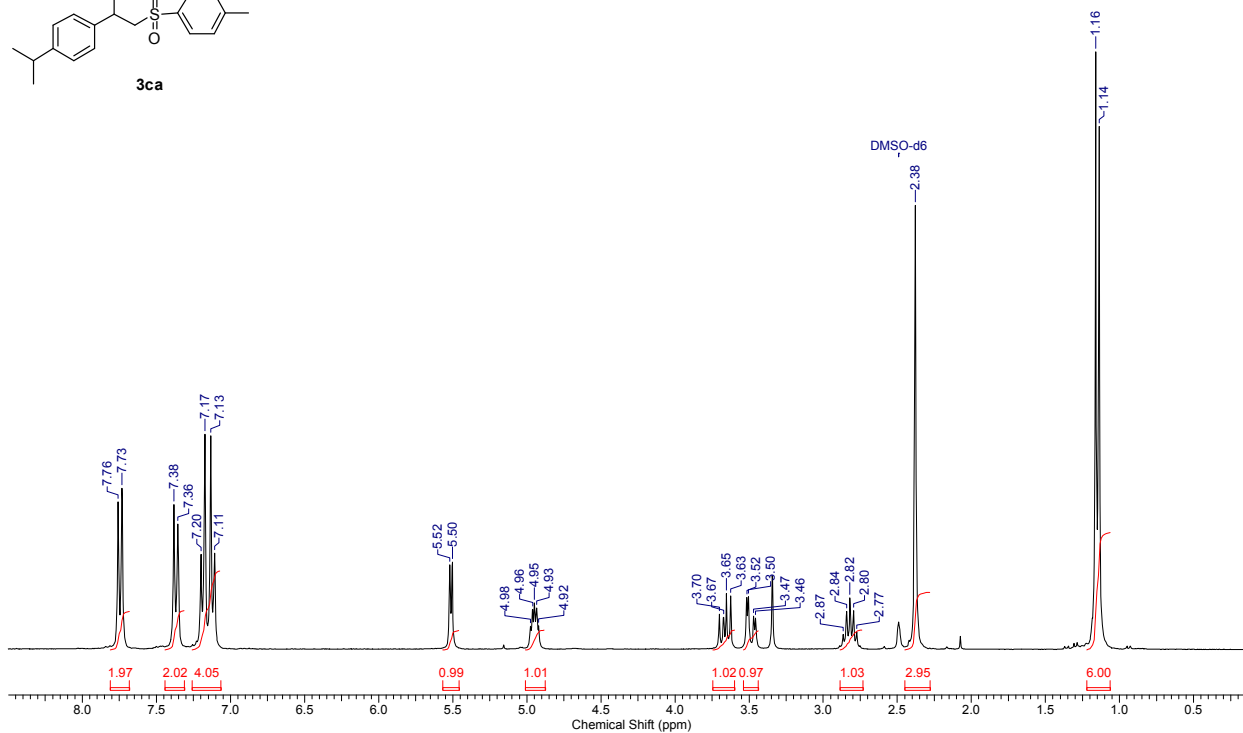

|                        |            |         |                      |                        |          |
|------------------------|------------|---------|----------------------|------------------------|----------|
| Acquisition Time (sec) | 0.9002     | Date    | 18 Nov 2015 17:21:04 | File Name              |          |
| Frequency (MHz)        | 75.48      | Nucleus | <sup>13</sup> C      | Number of Transients   | 120      |
| Pulse Sequence         | zpgg60base | Solvent | DMSO-D6              | Original Points Count  | 16308    |
|                        |            |         |                      | Sweep Width (Hz)       | 18115.94 |
|                        |            |         |                      | Temperature (degree C) | 24.600   |
|                        |            |         |                      | Points Count           | 16384    |

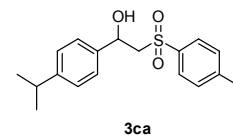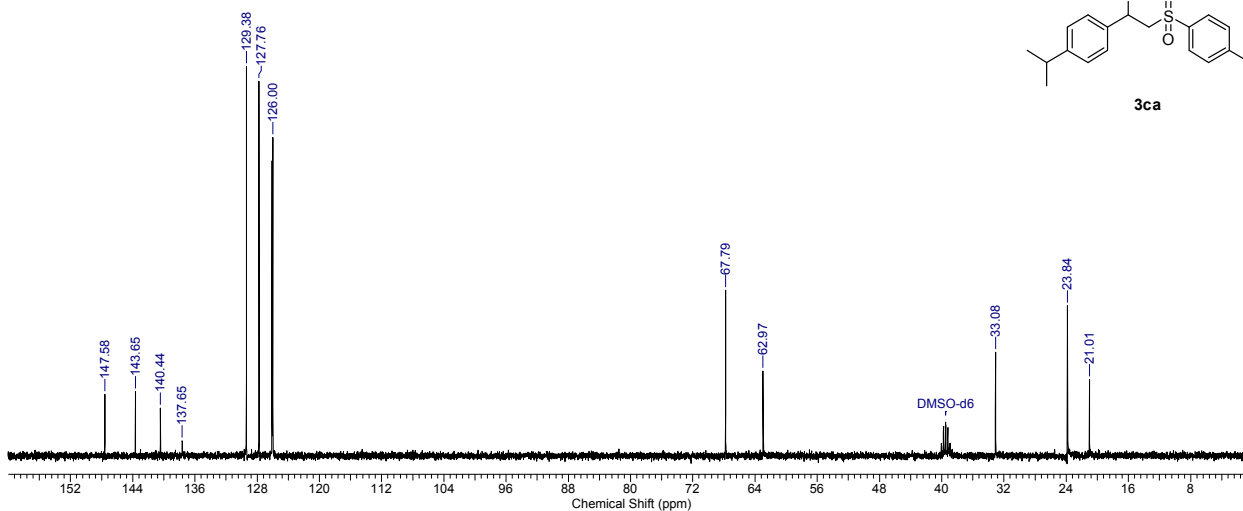



# 1-(4-*tert*-Butylphenyl)-2-[(4-methylphenyl)sulfonyl]ethanol (3da)

|                        |        |         |                      |                       |         |
|------------------------|--------|---------|----------------------|-----------------------|---------|
| Acquisition Time (sec) | 1.3521 | Date    | 01 Dec 2015 11:29:04 | File Name             |         |
| Frequency (MHz)        | 300.13 | Nucleus | <sup>1</sup> H       | Number of Transients  | 1       |
| Pulse Sequence         | zg     | Solvent | DMSO-D6              | Sweep Width (Hz)      | 6002.40 |
|                        |        |         |                      | Original Points Count | 8116    |
|                        |        |         |                      | Points Count          | 8192    |

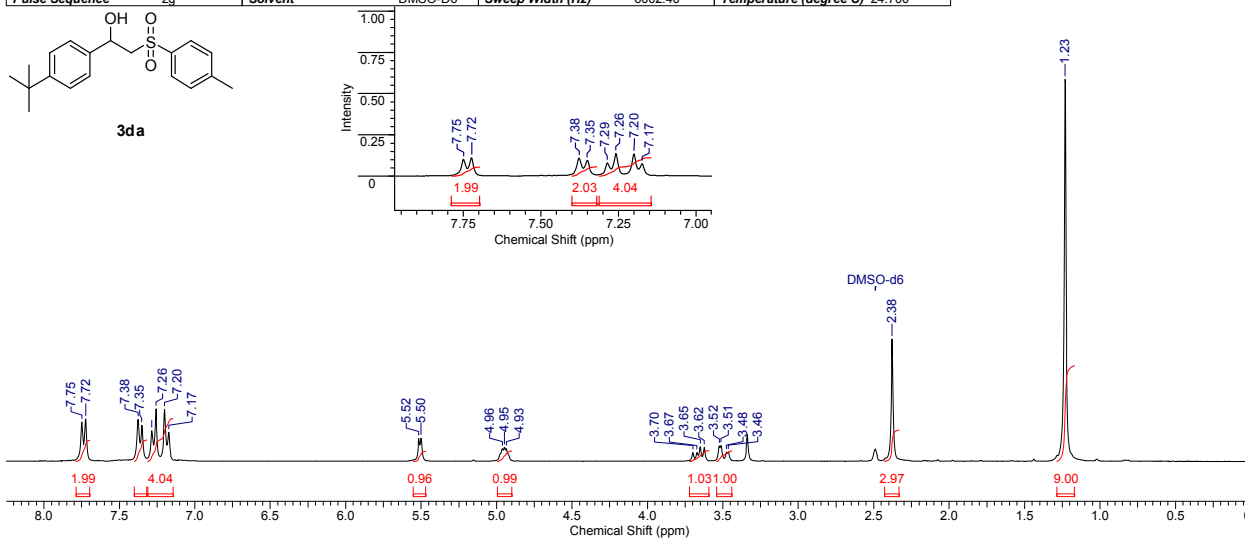

|                        |            |         |                      |                       |          |
|------------------------|------------|---------|----------------------|-----------------------|----------|
| Acquisition Time (sec) | 0.9002     | Date    | 02 Dec 2015 11:39:44 | File Name             |          |
| Frequency (MHz)        | 75.48      | Nucleus | <sup>13</sup> C      | Number of Transients  | 307      |
| Pulse Sequence         | zgpg60base | Solvent | DMSO-D6              | Sweep Width (Hz)      | 18115.94 |
|                        |            |         |                      | Original Points Count | 16308    |
|                        |            |         |                      | Points Count          | 16384    |

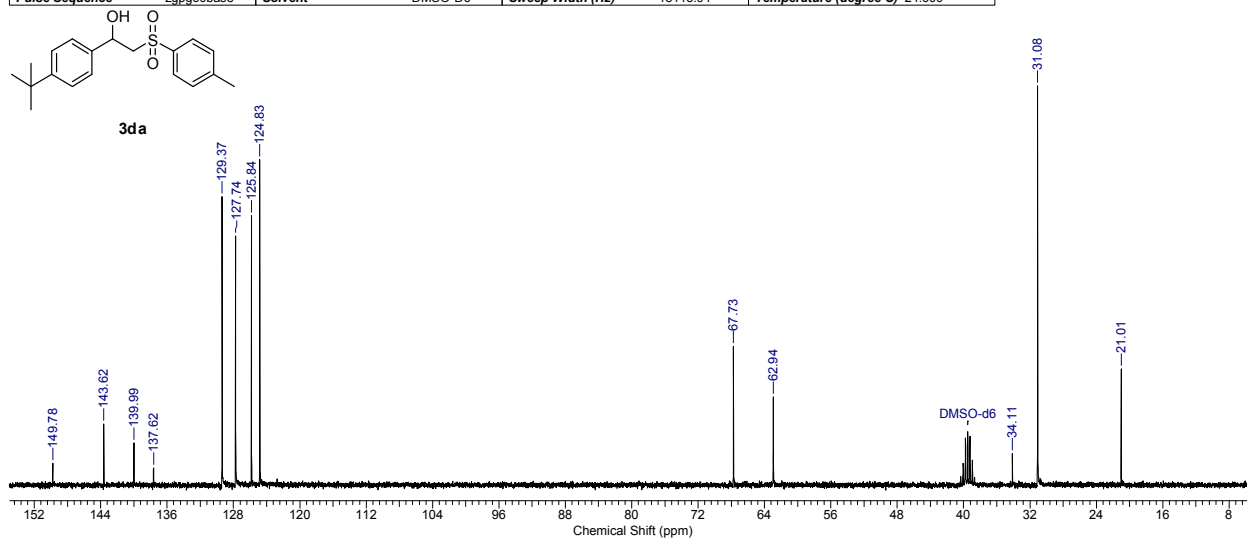



## 2-[(4-Iodophenyl)sulfonyl]-1-phenylethanol (3ab)

|                        |        |         |                      |                        |         |
|------------------------|--------|---------|----------------------|------------------------|---------|
| Acquisition Time (sec) | 1.3521 | Date    | 18 Nov 2015 17:10:24 | File Name              |         |
| Frequency (MHz)        | 300.13 | Nucleus | <sup>1</sup> H       | Number of Transients   | 1       |
| Pulse Sequence         | zg     | Solvent | DMSO-D6              | Sweep Width (Hz)       | 6002.40 |
|                        |        |         |                      | Original Points Count  | 8116    |
|                        |        |         |                      | Points Count           | 8192    |
|                        |        |         |                      | Temperature (degree C) | 24.500  |

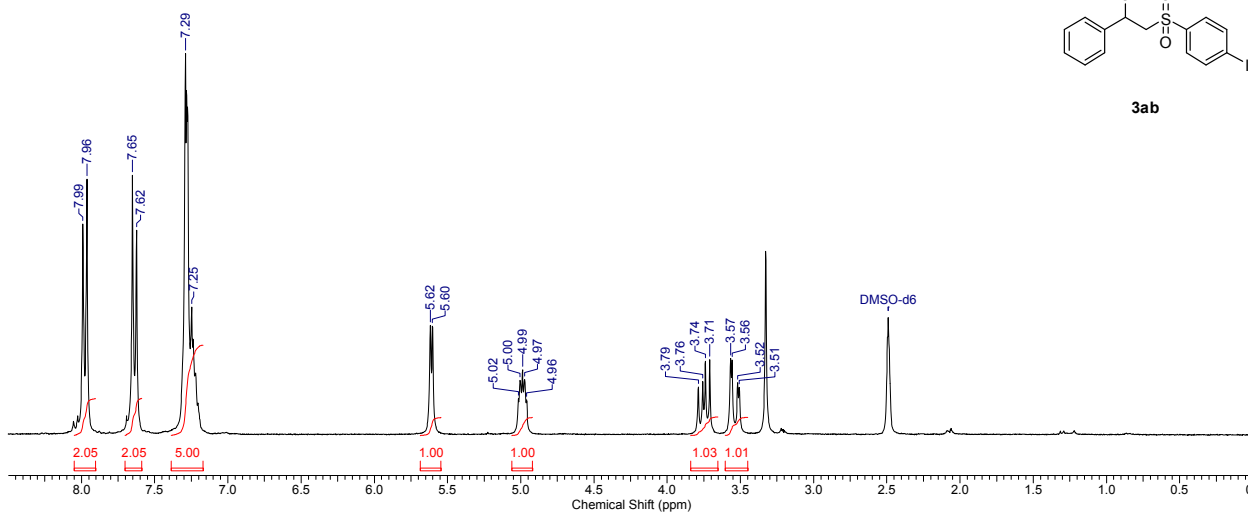

|                        |            |         |                      |                        |          |
|------------------------|------------|---------|----------------------|------------------------|----------|
| Acquisition Time (sec) | 0.9002     | Date    | 18 Nov 2015 17:12:32 | File Name              |          |
| Frequency (MHz)        | 75.48      | Nucleus | <sup>13</sup> C      | Number of Transients   | 226      |
| Pulse Sequence         | zpgg60base | Solvent | DMSO-D6              | Sweep Width (Hz)       | 18115.94 |
|                        |            |         |                      | Original Points Count  | 16308    |
|                        |            |         |                      | Points Count           | 16384    |
|                        |            |         |                      | Temperature (degree C) | 24.500   |

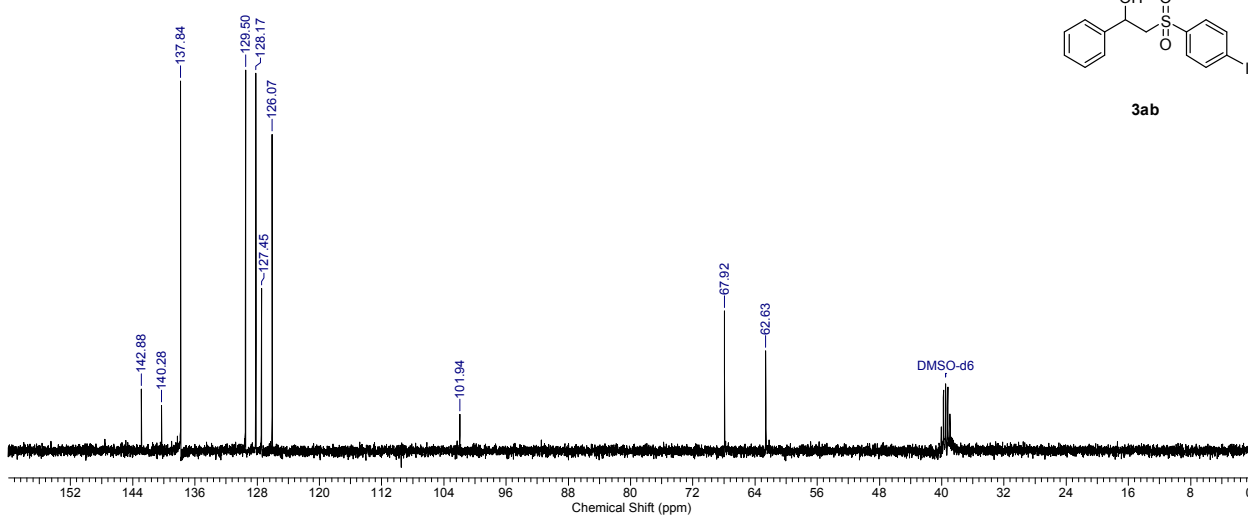

## 2-[(4-Methylphenyl)sulfonyl]-1-phenylethanone (4aa)

|                        |        |         |                      |                        |         |
|------------------------|--------|---------|----------------------|------------------------|---------|
| Acquisition Time (sec) | 1.3518 | Date    | 26 Nov 2015 13:39:12 | File Name              |         |
| Frequency (MHz)        | 300.13 | Nucleus | <sup>1</sup> H       | Original Points Count  | 8124    |
| Pulse Sequence         | zg     | Solvent | CHLOROFORM-D         | Sweep Width (Hz)       | 6009.62 |
|                        |        |         |                      | Points Count           | 8192    |
|                        |        |         |                      | Temperature (degree C) | 25.500  |

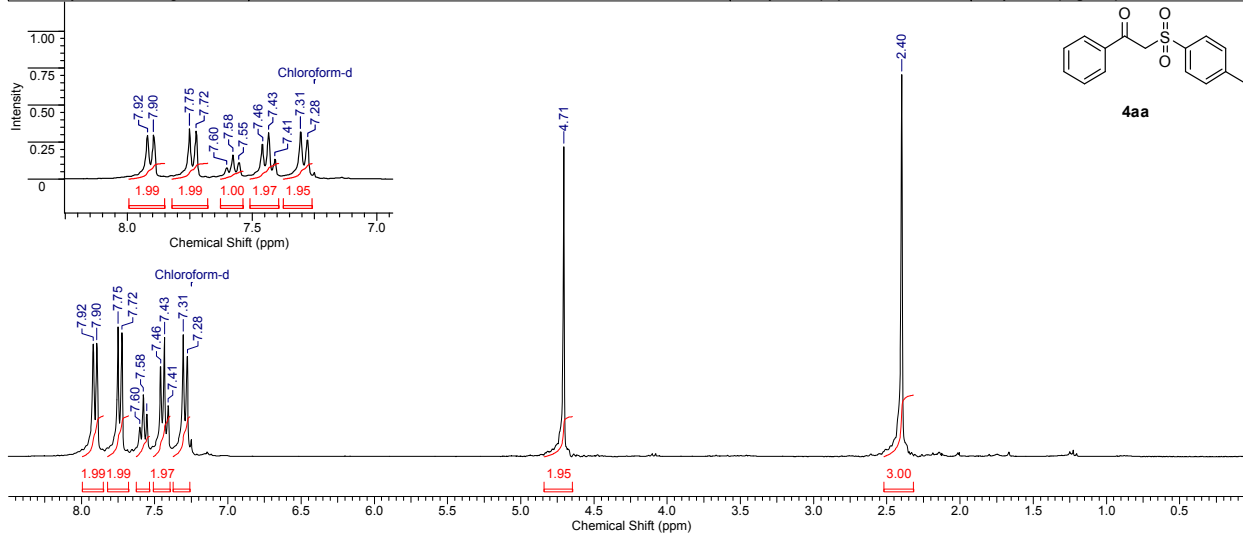

|                        |              |                       |                |                        |                      |
|------------------------|--------------|-----------------------|----------------|------------------------|----------------------|
| Acquisition Time (sec) | 0.8680       | Comment               | adil_cdcl3.c13 | Date                   | 28 Nov 2015 11:46:08 |
| File Name              |              |                       |                | Frequency (MHz)        | 75.48                |
| Number of Transients   | 219          | Original Points Count | 16316          | Nucleus                | <sup>13</sup> C      |
| Solvent                | CHLOROFORM-D |                       |                | Points Count           | 16384                |
|                        |              |                       |                | Pulse Sequence         | zgpg60base           |
|                        |              |                       |                | Sweep Width (Hz)       | 18796.99             |
|                        |              |                       |                | Temperature (degree C) | 26.600               |

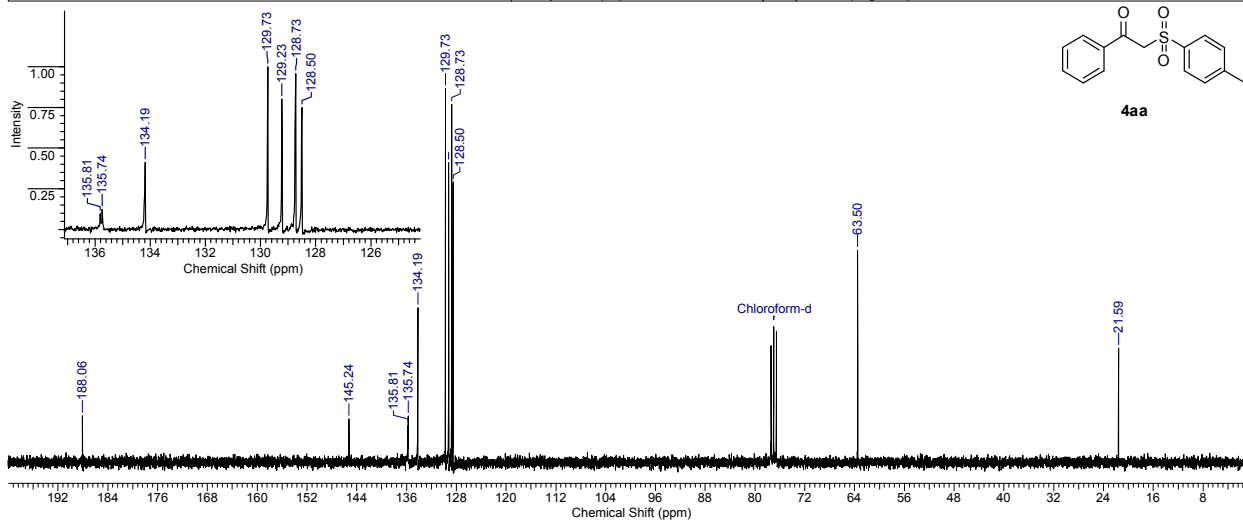

# 1-(2-Methylphenyl)-2-[(4-methylphenyl)sulfonyl]ethanone (4ba)

|                        |        |         |                      |                        |         |
|------------------------|--------|---------|----------------------|------------------------|---------|
| Acquisition Time (sec) | 1.3518 | Date    | 07 Dec 2015 16:25:36 | File Name              |         |
| Frequency (MHz)        | 300.13 | Nucleus | <sup>1</sup> H       | Number of Transients   | 1       |
| Pulse Sequence         | zg     | Solvent | CHLOROFORM-D         | Original Points Count  | 8124    |
|                        |        |         |                      | Sweep Width (Hz)       | 6009.62 |
|                        |        |         |                      | Points Count           | 8192    |
|                        |        |         |                      | Temperature (degree C) | 24.900  |

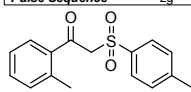

4ba

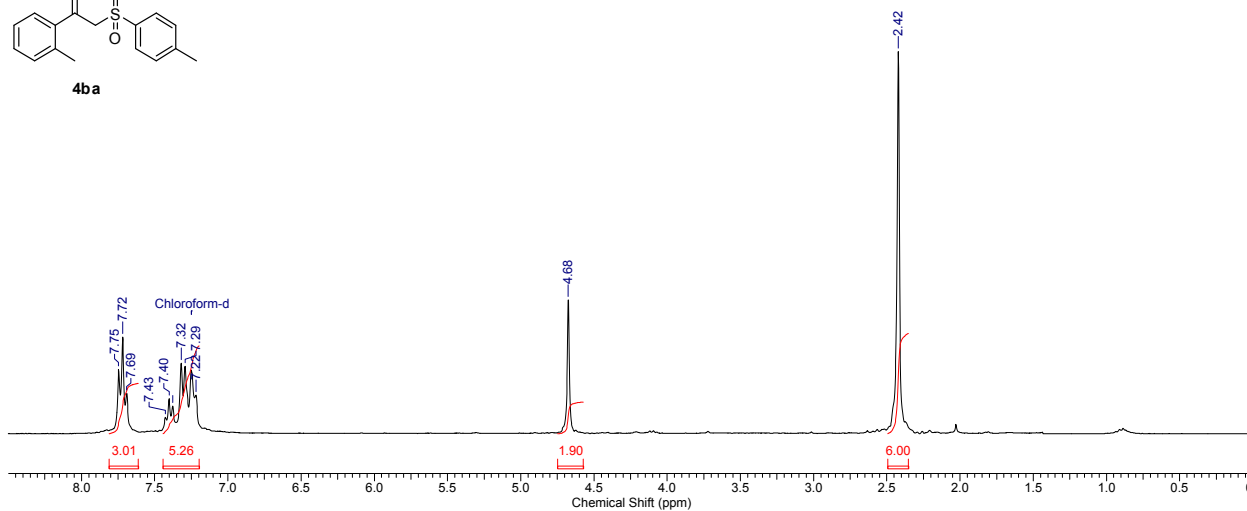

|                        |        |         |                      |                        |          |
|------------------------|--------|---------|----------------------|------------------------|----------|
| Acquisition Time (sec) | 0.9006 | Date    | 09 Dec 2015 15:13:04 | File Name              |          |
| Frequency (MHz)        | 75.48  | Nucleus | <sup>13</sup> C      | Number of Transients   | 126      |
| Pulse Sequence         | zpgg30 | Solvent | CHLOROFORM-D         | Original Points Count  | 16316    |
|                        |        |         |                      | Sweep Width (Hz)       | 18115.94 |
|                        |        |         |                      | Points Count           | 16384    |
|                        |        |         |                      | Temperature (degree C) | 25.200   |

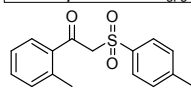

4ba

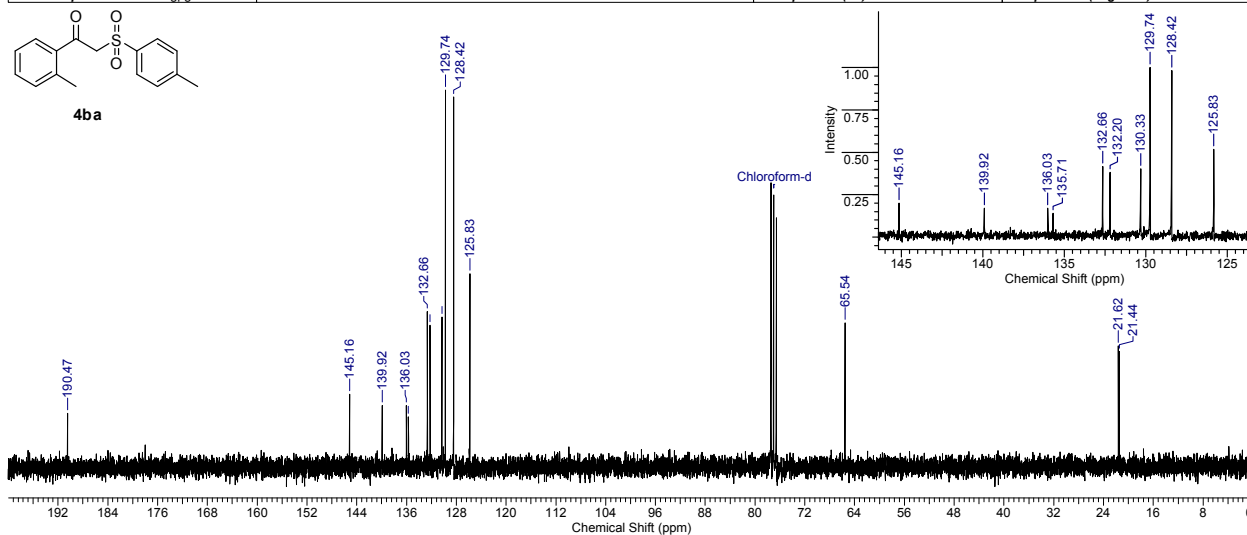

# 1-(4-Isopropylphenyl)-2-[(4-methylphenyl)sulfonyl]ethanone (4ca)

|                        |        |         |                      |                        |         |
|------------------------|--------|---------|----------------------|------------------------|---------|
| Acquisition Time (sec) | 1.3518 | Date    | 07 Dec 2015 16:27:44 | File Name              |         |
| Frequency (MHz)        | 300.13 | Nucleus | 1H                   | Number of Transients   | 1       |
| Pulse Sequence         | zg     | Solvent | CHLOROFORM-D         | Original Points Count  | 8124    |
|                        |        |         |                      | Sweep Width (Hz)       | 6009.62 |
|                        |        |         |                      | Points Count           | 8192    |
|                        |        |         |                      | Temperature (degree C) | 24.900  |

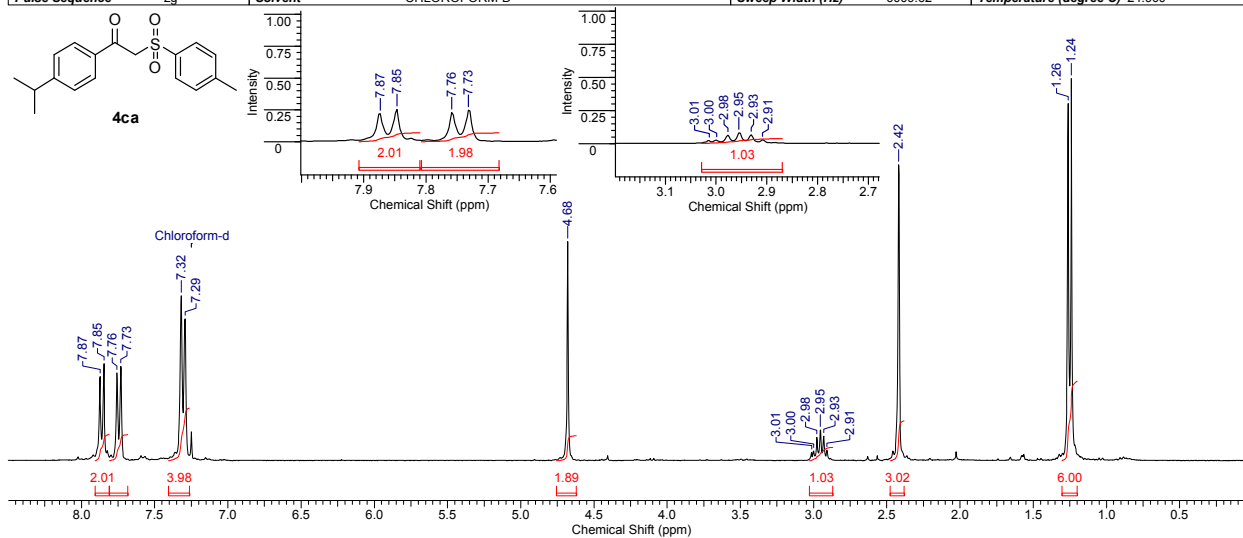

|                        |        |         |                      |                        |          |
|------------------------|--------|---------|----------------------|------------------------|----------|
| Acquisition Time (sec) | 0.9006 | Date    | 09 Dec 2015 15:21:36 | File Name              |          |
| Frequency (MHz)        | 75.48  | Nucleus | 13C                  | Number of Transients   | 658      |
| Pulse Sequence         | zgpg30 | Solvent | CHLOROFORM-D         | Original Points Count  | 16316    |
|                        |        |         |                      | Sweep Width (Hz)       | 18115.94 |
|                        |        |         |                      | Points Count           | 16384    |
|                        |        |         |                      | Temperature (degree C) | 25.100   |

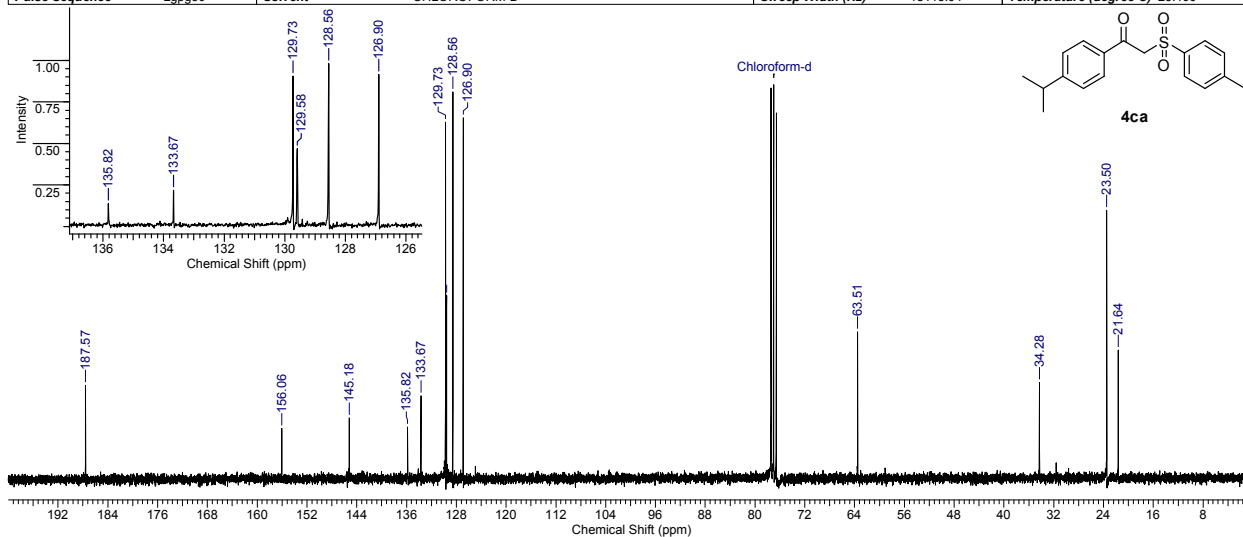

# 1-(4-*tert*-Butylphenyl)-2-[(4-methylphenyl)sulfonyl]ethanone (4da)

|                        |         |                        |                      |                |                      |
|------------------------|---------|------------------------|----------------------|----------------|----------------------|
| Acquisition Time (sec) | 1.0832  | Comment                | Avance-300, 1H CDCl3 | Date           | 11 Dec 2015 12:26:40 |
| File Name              |         | Frequency (MHz)        | 300.13               | Nucleus        | 1H                   |
| Original Points Count  | 8124    | Points Count           | 8192                 | Pulse Sequence | zg                   |
| Sweep Width (Hz)       | 7500.00 | Temperature (degree C) | 24.400               | Solvent        | CHLOROFORM-D         |

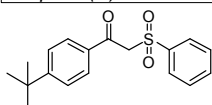

4da

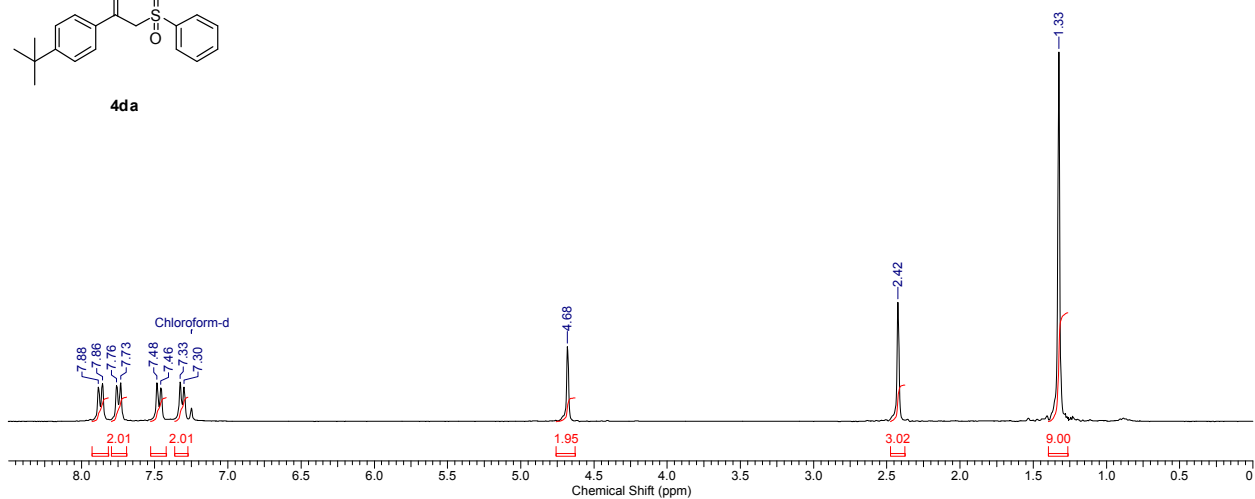

|                        |              |                        |                |                |                      |
|------------------------|--------------|------------------------|----------------|----------------|----------------------|
| Acquisition Time (sec) | 0.8680       | Comment                | adil_cdcl3.c13 | Date           | 12 Dec 2015 12:52:16 |
| File Name              |              | Frequency (MHz)        | 75.48          | Nucleus        | 13C                  |
| Number of Transients   | 184          | Original Points Count  | 16316          | Points Count   | 16384                |
| Solvent                | CHLOROFORM-D | Sweep Width (Hz)       | 18796.99       | Pulse Sequence | zpgg60base           |
|                        |              | Temperature (degree C) | 27.200         |                |                      |

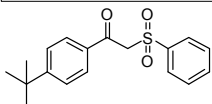

4da

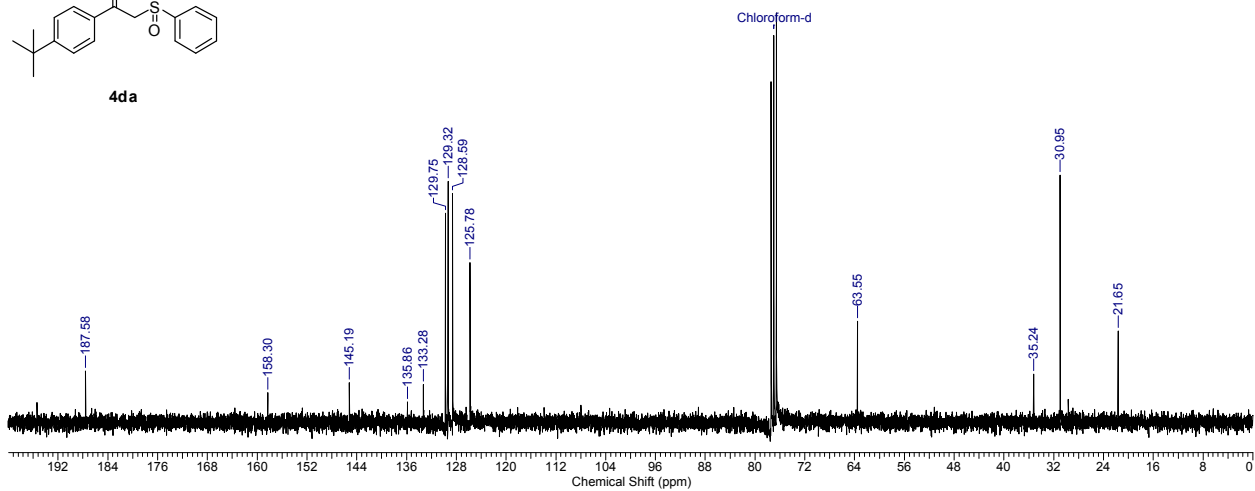

# 1-(4-Chlorophenyl)-2-[(4-methylphenyl)sulfonyl]ethanone (4ea)

|                        |         |                        |                      |                |                      |                      |              |
|------------------------|---------|------------------------|----------------------|----------------|----------------------|----------------------|--------------|
| Acquisition Time (sec) | 1.0832  | Comment                | Avance-300, 1H CDCl3 | Date           | 28 Nov 2015 10:14:24 |                      |              |
| File Name              |         | Frequency (MHz)        | 300.13               | Nucleus        | 1H                   | Number of Transients | 1            |
| Original Points Count  | 8124    | Points Count           | 8192                 | Pulse Sequence | zg                   | Solvent              | CHLOROFORM-D |
| Sweep Width (Hz)       | 7500.00 | Temperature (degree C) | 25.200               |                |                      |                      |              |

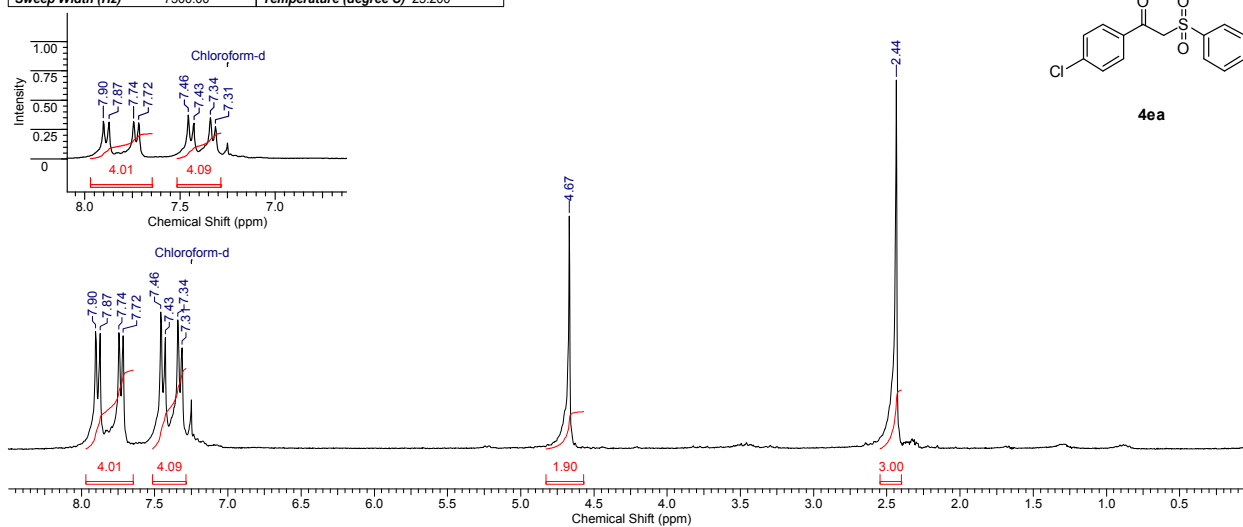

|                        |        |         |                      |                        |          |
|------------------------|--------|---------|----------------------|------------------------|----------|
| Acquisition Time (sec) | 0.9006 | Date    | 01 Dec 2015 11:54:40 | File Name              |          |
| Frequency (MHz)        | 75.48  | Nucleus | 13C                  | Number of Transients   | 301      |
| Pulse Sequence         | zgpg30 | Solvent | CHLOROFORM-D         | Original Points Count  | 16316    |
|                        |        |         |                      | Sweep Width (Hz)       | 18115.94 |
|                        |        |         |                      | Points Count           | 16384    |
|                        |        |         |                      | Temperature (degree C) | 24.700   |

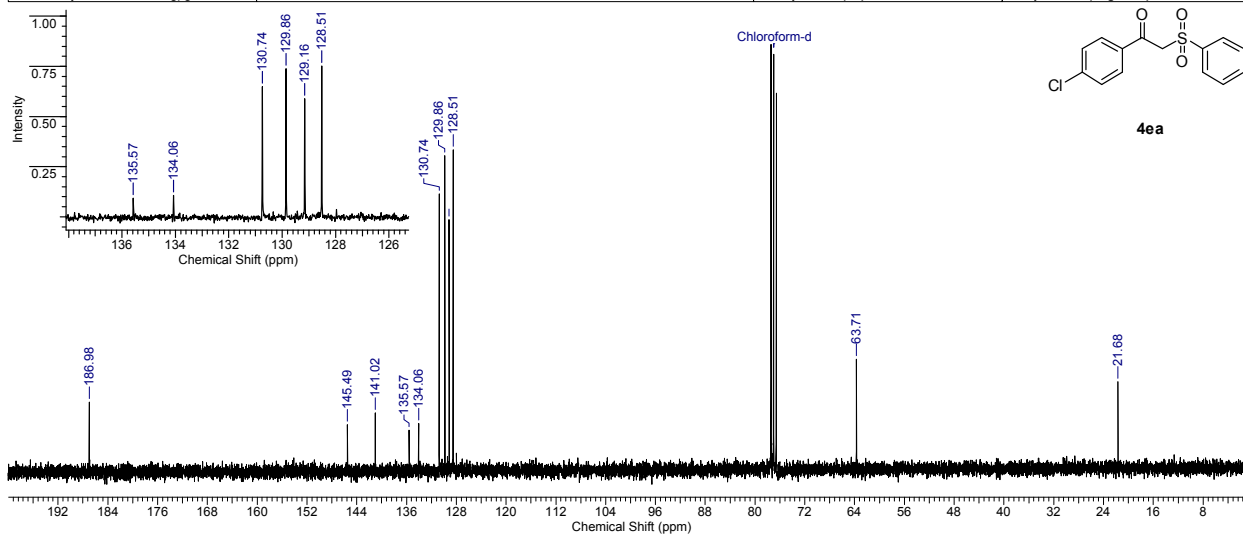



## 2-[(4-Iodophenyl)sulfonyl]-1-phenylethanone (4ab)

|                        |        |         |                      |                        |         |
|------------------------|--------|---------|----------------------|------------------------|---------|
| Acquisition Time (sec) | 1.3518 | Date    | 16 Dec 2015 13:11:28 | File Name              |         |
| Frequency (MHz)        | 300.13 | Nucleus | <sup>1</sup> H       | Number of Transients   | 1       |
| Pulse Sequence         | zg     | Solvent | CHLOROFORM-D         | Original Points Count  | 8124    |
|                        |        |         |                      | Sweep Width (Hz)       | 6009.62 |
|                        |        |         |                      | Points Count           | 8192    |
|                        |        |         |                      | Temperature (degree C) | 24.700  |

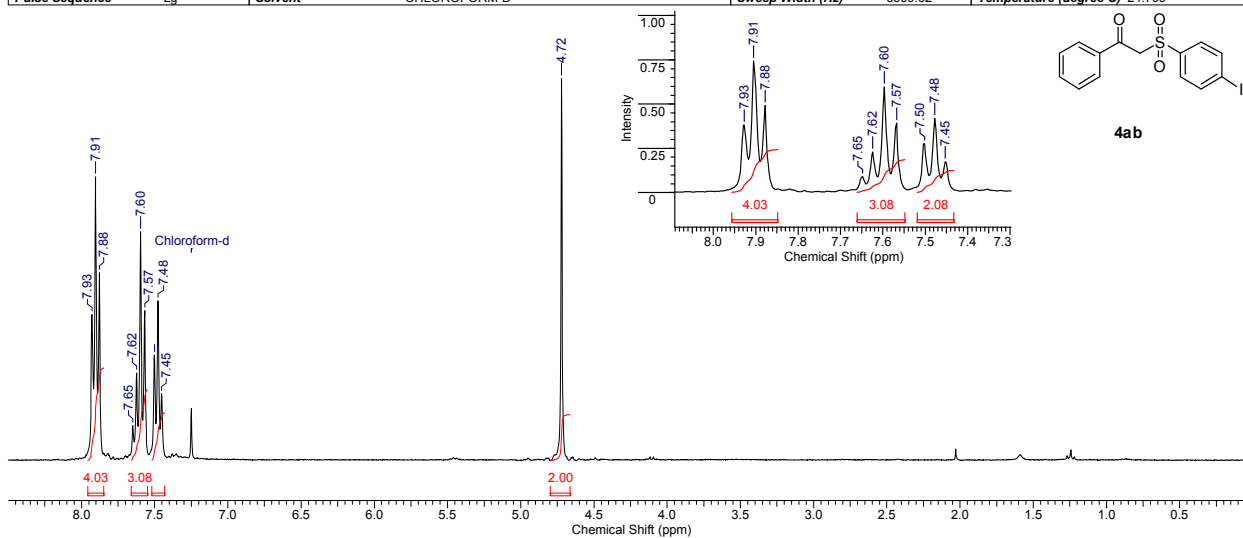

|                        |        |         |                      |                        |          |
|------------------------|--------|---------|----------------------|------------------------|----------|
| Acquisition Time (sec) | 0.9006 | Date    | 16 Dec 2015 16:04:16 | File Name              |          |
| Frequency (MHz)        | 75.48  | Nucleus | <sup>13</sup> C      | Number of Transients   | 200      |
| Pulse Sequence         | zgpg30 | Solvent | CHLOROFORM-D         | Original Points Count  | 16316    |
|                        |        |         |                      | Sweep Width (Hz)       | 18115.94 |
|                        |        |         |                      | Points Count           | 16384    |
|                        |        |         |                      | Temperature (degree C) | 24.500   |

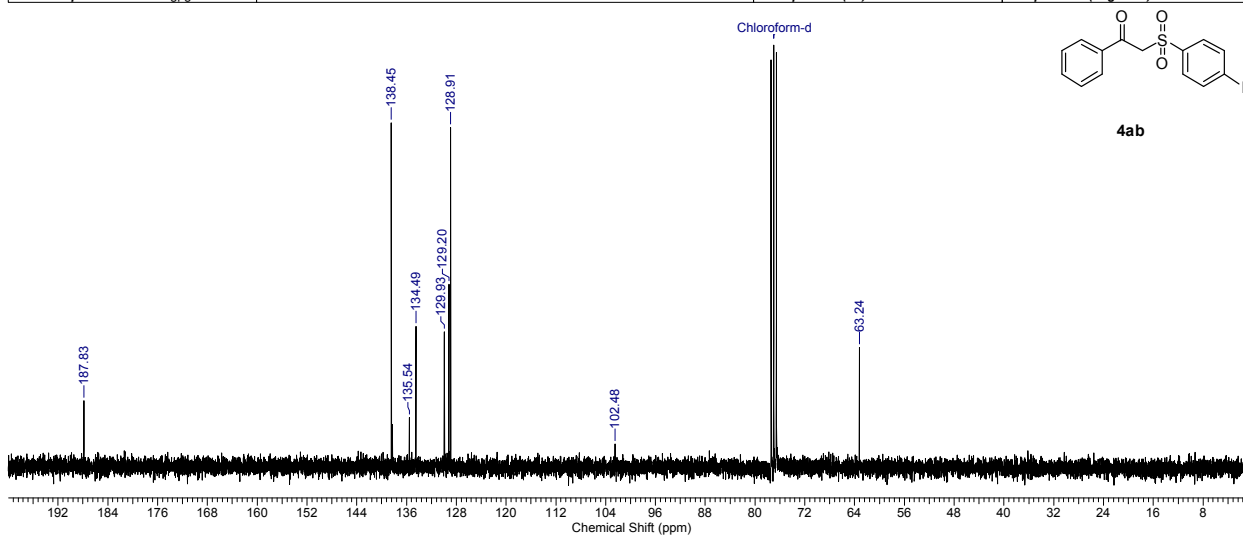

# 1-[(4-Methylphenyl)sulfonyl]-2-phenylpropan-2-ol (3fa)

|                        |        |         |                      |                        |         |
|------------------------|--------|---------|----------------------|------------------------|---------|
| Acquisition Time (sec) | 1.3518 | Date    | 07 May 2015 11:14:08 | File Name              |         |
| Frequency (MHz)        | 300.13 | Nucleus | <sup>1</sup> H       | Number of Transients   | 8       |
| Pulse Sequence         | zg     | Solvent | CHLOROFORM-D         | Original Points Count  | 8124    |
|                        |        |         |                      | Sweep Width (Hz)       | 6009.62 |
|                        |        |         |                      | Points Count           | 8192    |
|                        |        |         |                      | Temperature (degree C) | 24.500  |

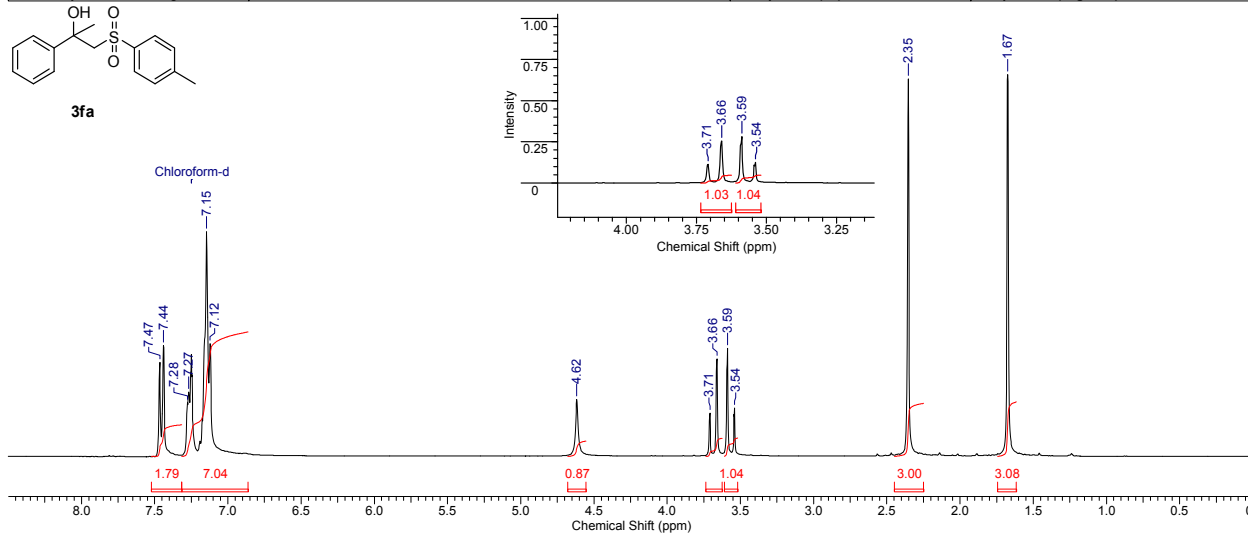

|                        |        |         |                      |                        |          |
|------------------------|--------|---------|----------------------|------------------------|----------|
| Acquisition Time (sec) | 0.9006 | Date    | 07 May 2015 12:56:32 | File Name              |          |
| Frequency (MHz)        | 75.48  | Nucleus | <sup>13</sup> C      | Number of Transients   | 180      |
| Pulse Sequence         | zgpg30 | Solvent | CHLOROFORM-D         | Original Points Count  | 16316    |
|                        |        |         |                      | Sweep Width (Hz)       | 18115.94 |
|                        |        |         |                      | Points Count           | 16384    |
|                        |        |         |                      | Temperature (degree C) | 24.800   |

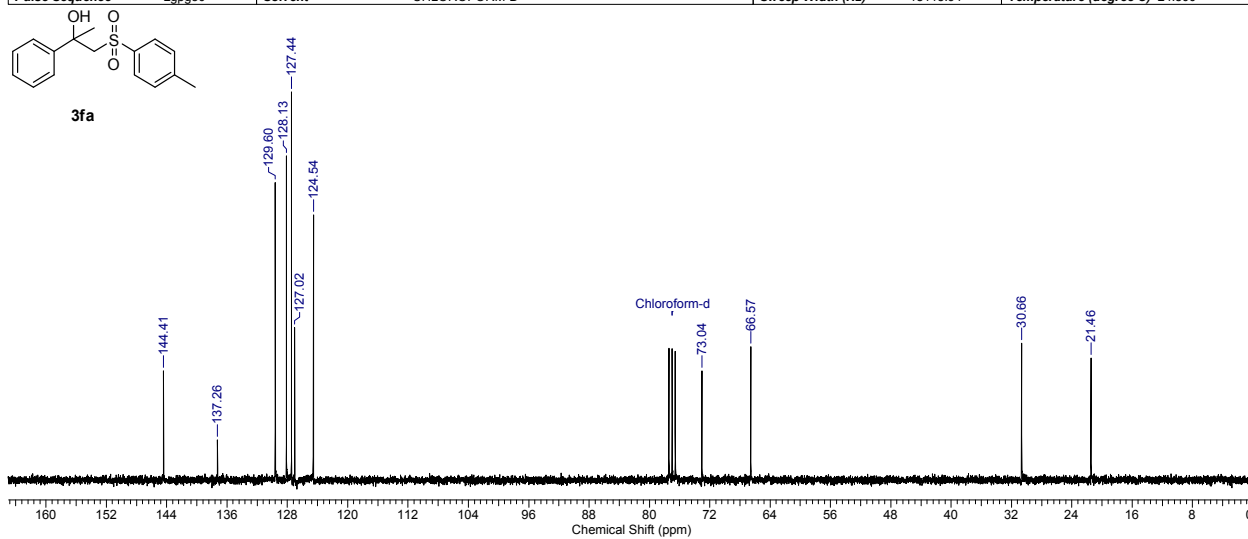

## 2-(4-Chlorophenyl)-1-[(4-methylphenyl)sulfonyl]propan-2-ol (3ga)

|                        |         |                        |                      |                |                      |
|------------------------|---------|------------------------|----------------------|----------------|----------------------|
| Acquisition Time (sec) | 1.3518  | Comment                | Avance-300, 1H CDCl3 | Date           | 20 Aug 2015 12:05:20 |
| File Name              |         | Frequency (MHz)        | 300.13               | Nucleus        | 1H                   |
| Original Points Count  | 8124    | Points Count           | 8192                 | Pulse Sequence | zg                   |
| Sweep Width (Hz)       | 6009.62 | Temperature (degree C) | 26.300               | Solvent        | CHLOROFORM-D         |

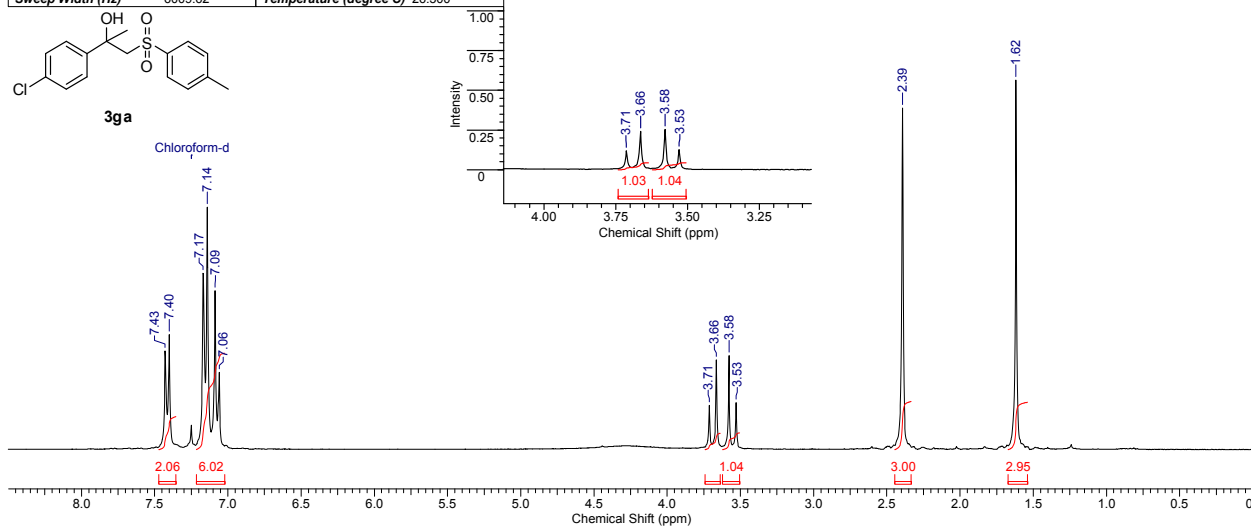

|                        |              |                       |                |                        |                      |
|------------------------|--------------|-----------------------|----------------|------------------------|----------------------|
| Acquisition Time (sec) | 0.8680       | Comment               | adil_cdcl3.c13 | Date                   | 21 Aug 2015 14:28:16 |
| File Name              |              | Frequency (MHz)       | 75.48          | Nucleus                | 13C                  |
| Number of Transients   | 103          | Original Points Count | 16316          | Pulse Sequence         | zgpg60base           |
| Solvent                | CHLOROFORM-D | Sweep Width (Hz)      | 18796.99       | Temperature (degree C) | 27.600               |

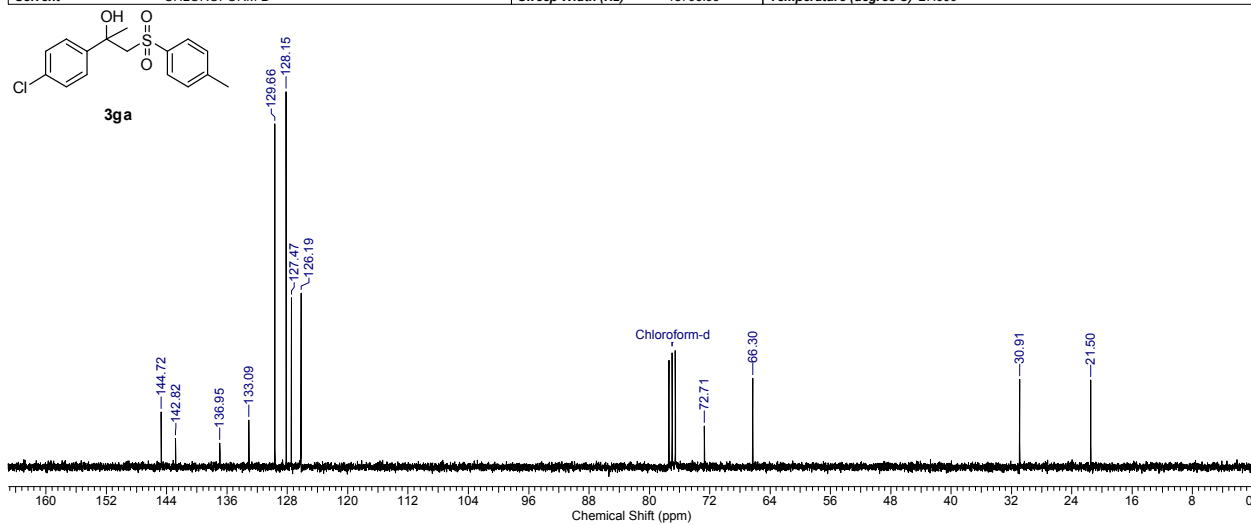

## 2-(4-Bromophenyl)-1-[(4-methylphenyl)sulfonyl]propan-2-ol (3ha)

| Acquisition Time (sec) | 1.3521 | Date    | 03 Dec 2015 12:43:44 | File Name              |        |
|------------------------|--------|---------|----------------------|------------------------|--------|
| Frequency (MHz)        | 300.13 | Nucleus | <sup>1</sup> H       | Number of Transients   | 1      |
| Pulse Sequence         | zg     | Solvent | DMSO-D6              | Original Points Count  | 8116   |
|                        |        |         |                      | Temperature (degree C) | 25.100 |
|                        |        |         |                      | Points Count           | 8192   |

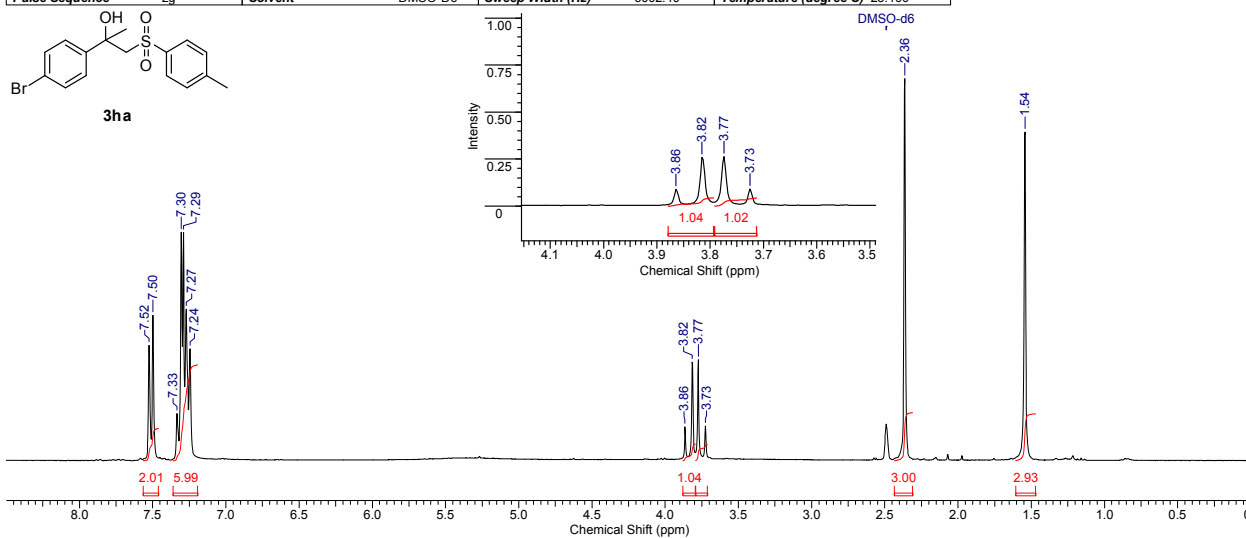

| Acquisition Time (sec) | 0.9002     | Date    | 03 Dec 2015 12:45:52 | File Name              |        |
|------------------------|------------|---------|----------------------|------------------------|--------|
| Frequency (MHz)        | 75.48      | Nucleus | <sup>13</sup> C      | Number of Transients   | 275    |
| Pulse Sequence         | zpgg60base | Solvent | DMSO-D6              | Original Points Count  | 16308  |
|                        |            |         |                      | Temperature (degree C) | 25.100 |
|                        |            |         |                      | Points Count           | 16384  |

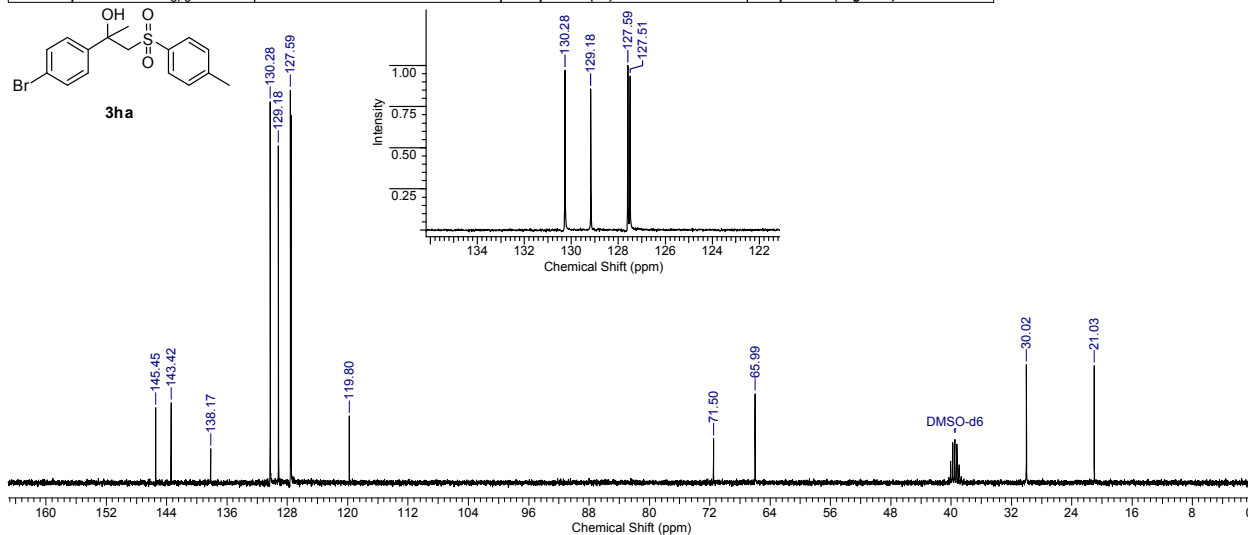

# 1-[(4-Methylphenyl)sulfonyl]-2-(4-nitrophenyl)propan-2-ol (3ia)

|                        |        |         |                      |                        |         |
|------------------------|--------|---------|----------------------|------------------------|---------|
| Acquisition Time (sec) | 1.3521 | Date    | 18 Nov 2015 17:27:28 | File Name              |         |
| Frequency (MHz)        | 300.13 | Nucleus | <sup>1</sup> H       | Number of Transients   | 1       |
| Pulse Sequence         | zg     | Solvent | DMSO-D6              | Original Points Count  | 8116    |
|                        |        |         |                      | Temperature (degree C) | 24.500  |
|                        |        |         |                      | Sweep Width (Hz)       | 6002.40 |
|                        |        |         |                      | Points Count           | 8192    |

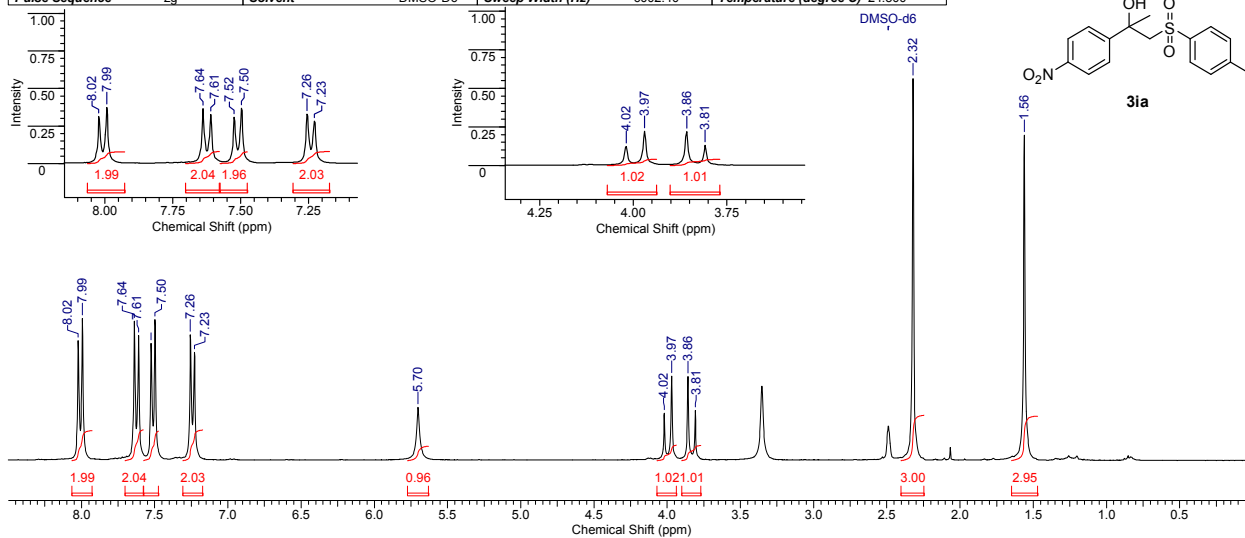

|                        |            |         |                      |                        |          |
|------------------------|------------|---------|----------------------|------------------------|----------|
| Acquisition Time (sec) | 0.9002     | Date    | 18 Nov 2015 17:27:28 | File Name              |          |
| Frequency (MHz)        | 75.48      | Nucleus | <sup>13</sup> C      | Number of Transients   | 102      |
| Pulse Sequence         | zpgg50base | Solvent | DMSO-D6              | Original Points Count  | 16308    |
|                        |            |         |                      | Temperature (degree C) | 24.500   |
|                        |            |         |                      | Sweep Width (Hz)       | 18115.94 |
|                        |            |         |                      | Points Count           | 16384    |

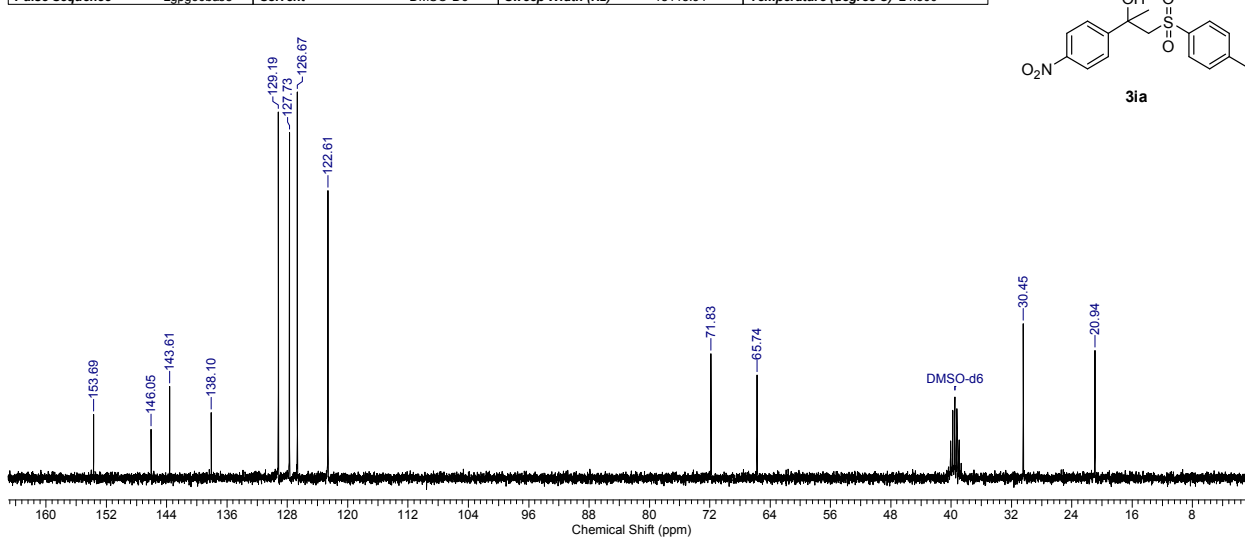

# 1-[(4-Methylphenyl)sulfonyl]-2-(4-methoxyphenyl)propan-2-ol (3ja)

|                        |        |         |                      |                        |         |
|------------------------|--------|---------|----------------------|------------------------|---------|
| Acquisition Time (sec) | 1.3518 | Date    | 01 Dec 2015 14:32:32 | File Name              |         |
| Frequency (MHz)        | 300.13 | Nucleus | <sup>1</sup> H       | Number of Transients   | 1       |
| Pulse Sequence         | zg     | Solvent | CHLOROFORM-D         | Original Points Count  | 8124    |
|                        |        |         |                      | Sweep Width (Hz)       | 6009.62 |
|                        |        |         |                      | Temperature (degree C) | 24.400  |

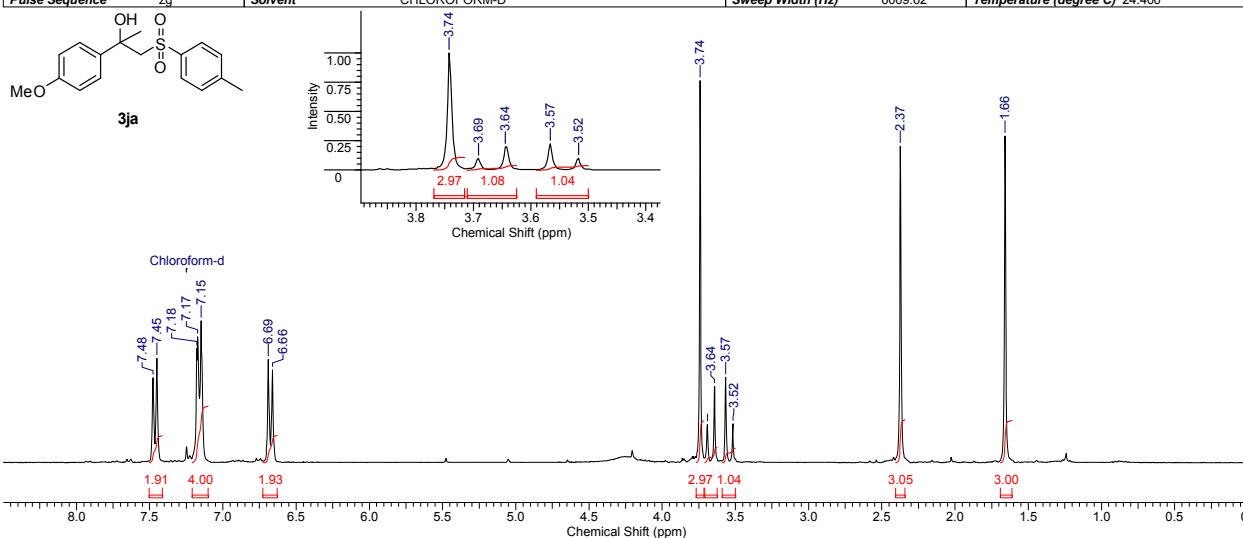

|                        |                 |                      |                |                       |                      |
|------------------------|-----------------|----------------------|----------------|-----------------------|----------------------|
| Acquisition Time (sec) | 0.8680          | Comment              | adil.cdcl3.c13 | Date                  | 01 Feb 2016 08:53:20 |
| File Name              |                 |                      |                | Frequency (MHz)       | 75.48                |
| Nucleus                | <sup>13</sup> C | Number of Transients | 152            | Original Points Count | 16316                |
| Pulse Sequence         | zgpg60base      | Solvent              | CHLOROFORM-D   | Sweep Width (Hz)      | 18796.99             |
| Temperature (degree C) | 27.400          |                      |                |                       |                      |

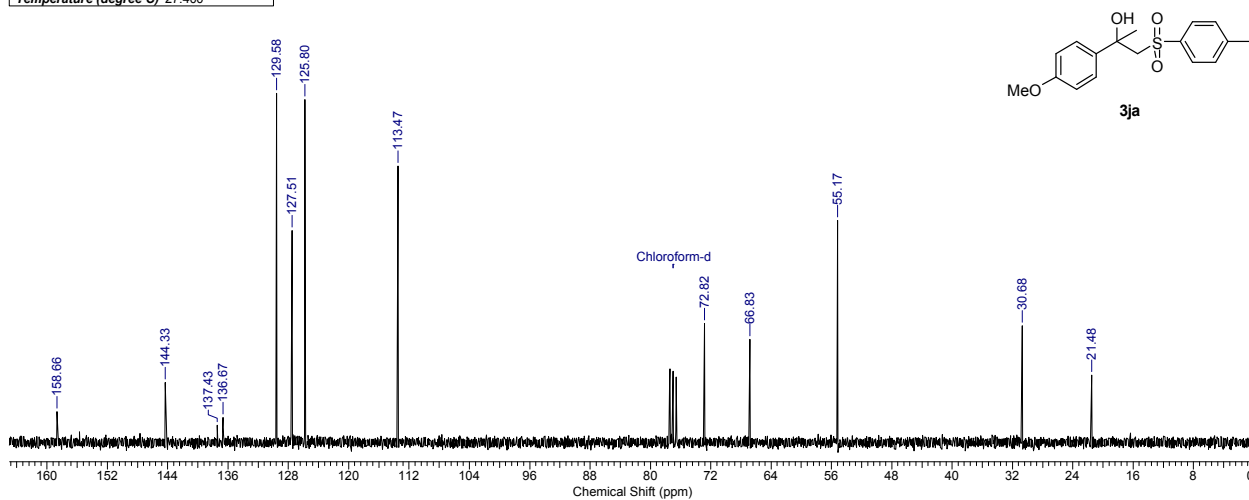

# 1-[(4-Bromophenyl)sulfonyl]-2-phenylpropan-2-ol (3fc)

|                        |        |                 |                        |                      |                      |
|------------------------|--------|-----------------|------------------------|----------------------|----------------------|
| Acquisition Time (sec) | 1.0821 | Comment         | Avance-300, 1H DMSO-d6 | Date                 | 21 Nov 2015 10:08:00 |
| File Name              |        | Frequency (MHz) | 300.13                 | Nucleus              | 1H                   |
| Original Points Count  | 8116   | Points Count    | 8192                   | Pulse Sequence       | zg                   |
| Temperature (degree C) | 25.300 |                 |                        | Solvent              | DMSO-D6              |
|                        |        |                 |                        | Number of Transients | 1                    |
|                        |        |                 |                        | Sweep Width (Hz)     | 7500.00              |

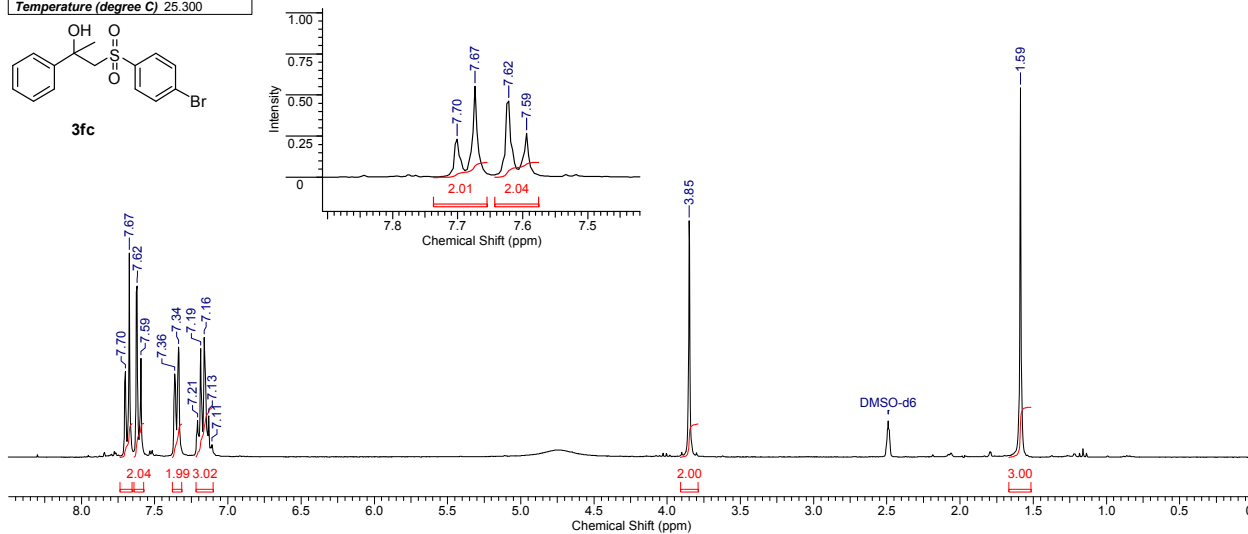

|                        |            |         |                      |                        |          |
|------------------------|------------|---------|----------------------|------------------------|----------|
| Acquisition Time (sec) | 0.9002     | Date    | 19 Nov 2015 11:52:32 | File Name              |          |
| Frequency (MHz)        | 75.48      | Nucleus | 13C                  | Number of Transients   | 260      |
| Pulse Sequence         | zpgg60base | Solvent | DMSO-D6              | Sweep Width (Hz)       | 18115.94 |
|                        |            |         |                      | Original Points Count  | 16308    |
|                        |            |         |                      | Points Count           | 16384    |
|                        |            |         |                      | Temperature (degree C) | 24.400   |

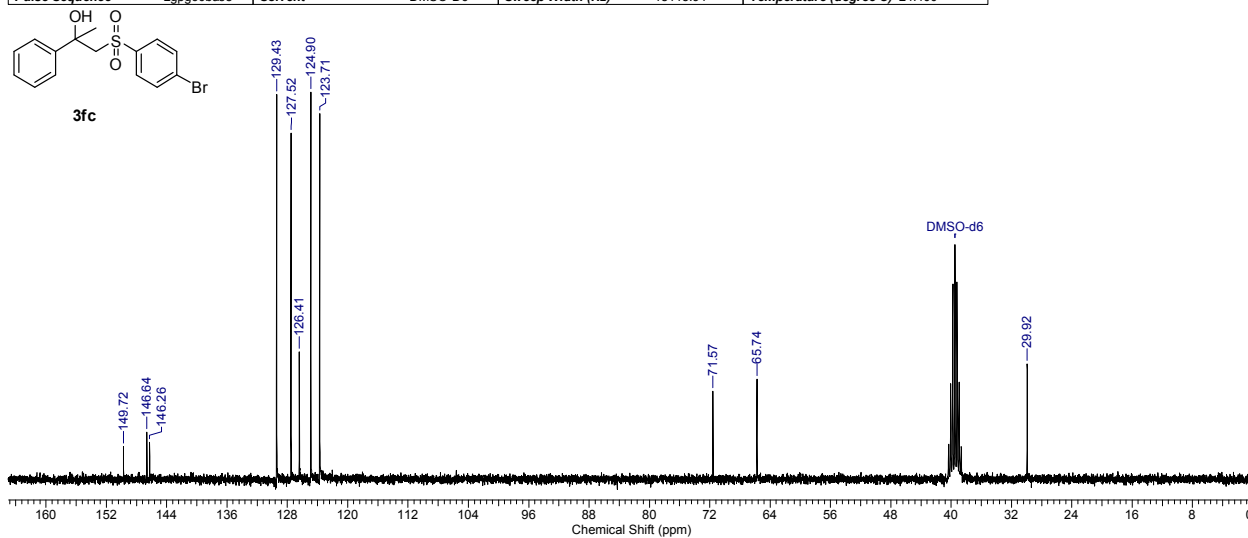

# 1-[(4-Methoxyphenyl)sulfonyl]-2-phenylpropan-2-ol (3fd)

|                        |        |         |                      |                        |         |
|------------------------|--------|---------|----------------------|------------------------|---------|
| Acquisition Time (sec) | 1.3518 | Date    | 08 Oct 2015 15:10:56 | File Name              |         |
| Frequency (MHz)        | 300.13 | Nucleus | <sup>1</sup> H       | Original Points Count  | 8124    |
| Pulse Sequence         | zg     | Solvent | CHLOROFORM-D         | Points Count           | 8192    |
|                        |        |         |                      | Sweep Width (Hz)       | 6009.62 |
|                        |        |         |                      | Temperature (degree C) | 26.400  |

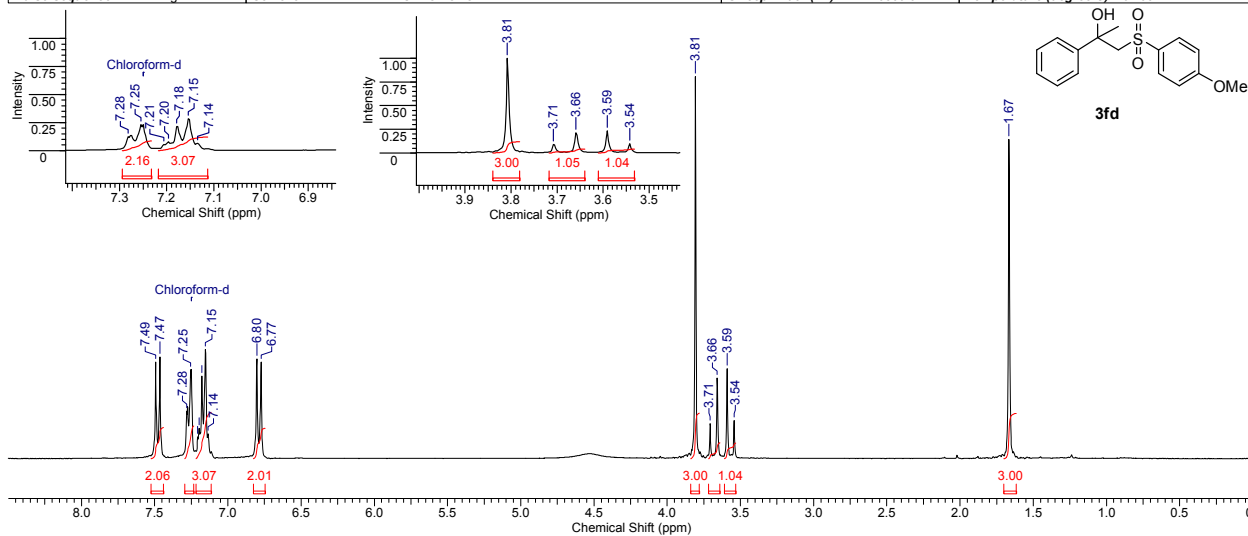

|                        |          |                        |                |                      |                      |
|------------------------|----------|------------------------|----------------|----------------------|----------------------|
| Acquisition Time (sec) | 0.8680   | Comment                | adil.cdcl3.c13 | Date                 | 10 Oct 2015 10:33:36 |
| File Name              |          |                        |                | Frequency (MHz)      | 75.48                |
| Original Points Count  | 16316    | Points Count           | 16384          | Nucleus              | <sup>13</sup> C      |
| Sweep Width (Hz)       | 18796.99 | Temperature (degree C) | 25.900         | Pulse Sequence       | zpgp60base           |
|                        |          |                        |                | Solvent              | CHLOROFORM-D         |
|                        |          |                        |                | Number of Transients | 244                  |

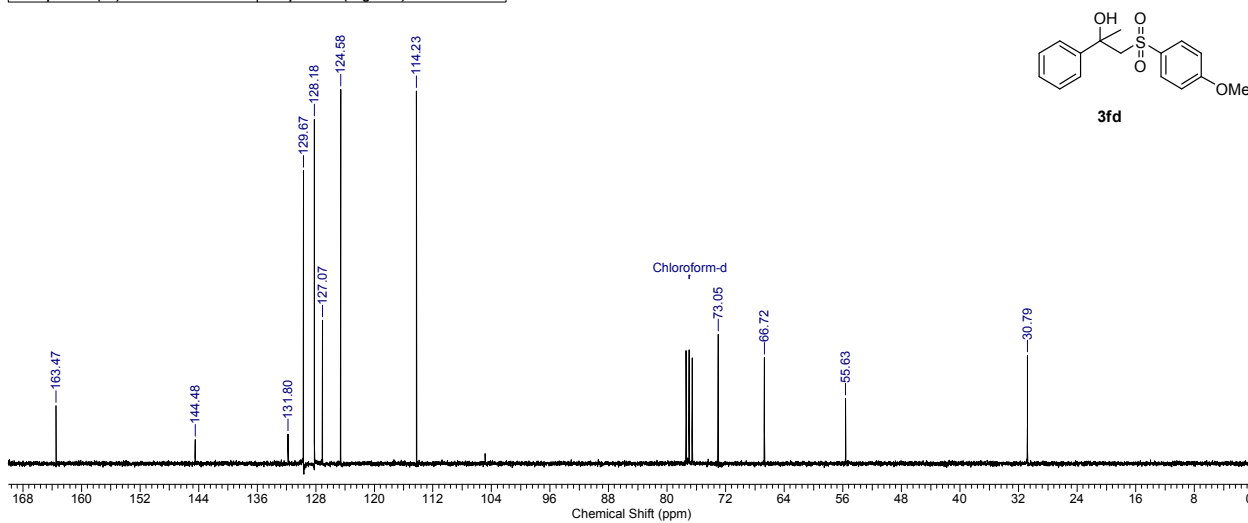



# 1-[(4-Nitrophenyl)sulfonyl]-2-phenylpropan-2-ol (3fe)

|                        |        |         |                      |                      |           |                               |
|------------------------|--------|---------|----------------------|----------------------|-----------|-------------------------------|
| Acquisition Time (sec) | 1.3521 | Date    | 18 Nov 2015 16:51:12 |                      | File Name |                               |
| Frequency (MHz)        | 300.13 | Nucleus | 1H                   | Number of Transients | 1         | Original Points Count 8116    |
| Pulse Sequence         | zg     | Solvent | DMSO-D6              | Sweep Width (Hz)     | 6002.40   | Points Count 8192             |
|                        |        |         |                      |                      |           | Temperature (degree C) 24.700 |

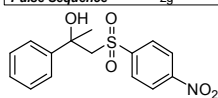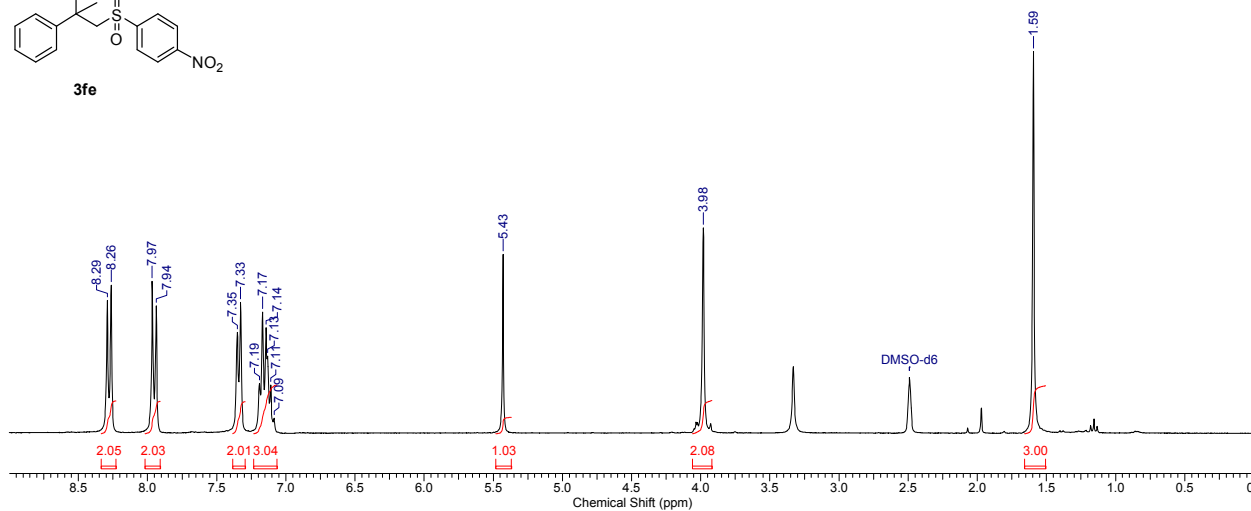

|                        |            |         |                      |                      |           |                               |
|------------------------|------------|---------|----------------------|----------------------|-----------|-------------------------------|
| Acquisition Time (sec) | 0.9002     | Date    | 19 Nov 2015 11:52:32 |                      | File Name |                               |
| Frequency (MHz)        | 75.48      | Nucleus | 13C                  | Number of Transients | 260       | Original Points Count 16308   |
| Pulse Sequence         | zpgg50base | Solvent | DMSO-D6              | Sweep Width (Hz)     | 18115.94  | Points Count 16384            |
|                        |            |         |                      |                      |           | Temperature (degree C) 24.400 |

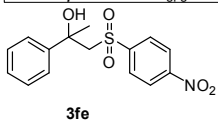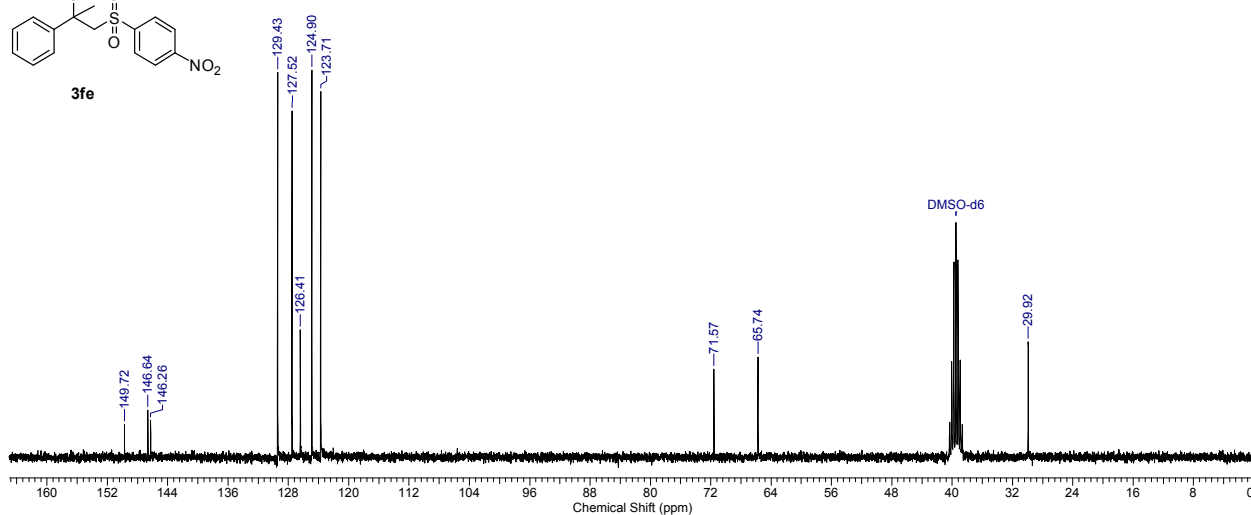

Supplement: c6ra19190h1.pdf [file c6ra19190h1.pdf]
